# Supplementary material for: Genetic complexity of miscanthus cell wall composition and biomass quality for biofuels
Source: Springer Nature journal article supplement (doi:10.1186/s12864-017-3802-7), 2017-05-25

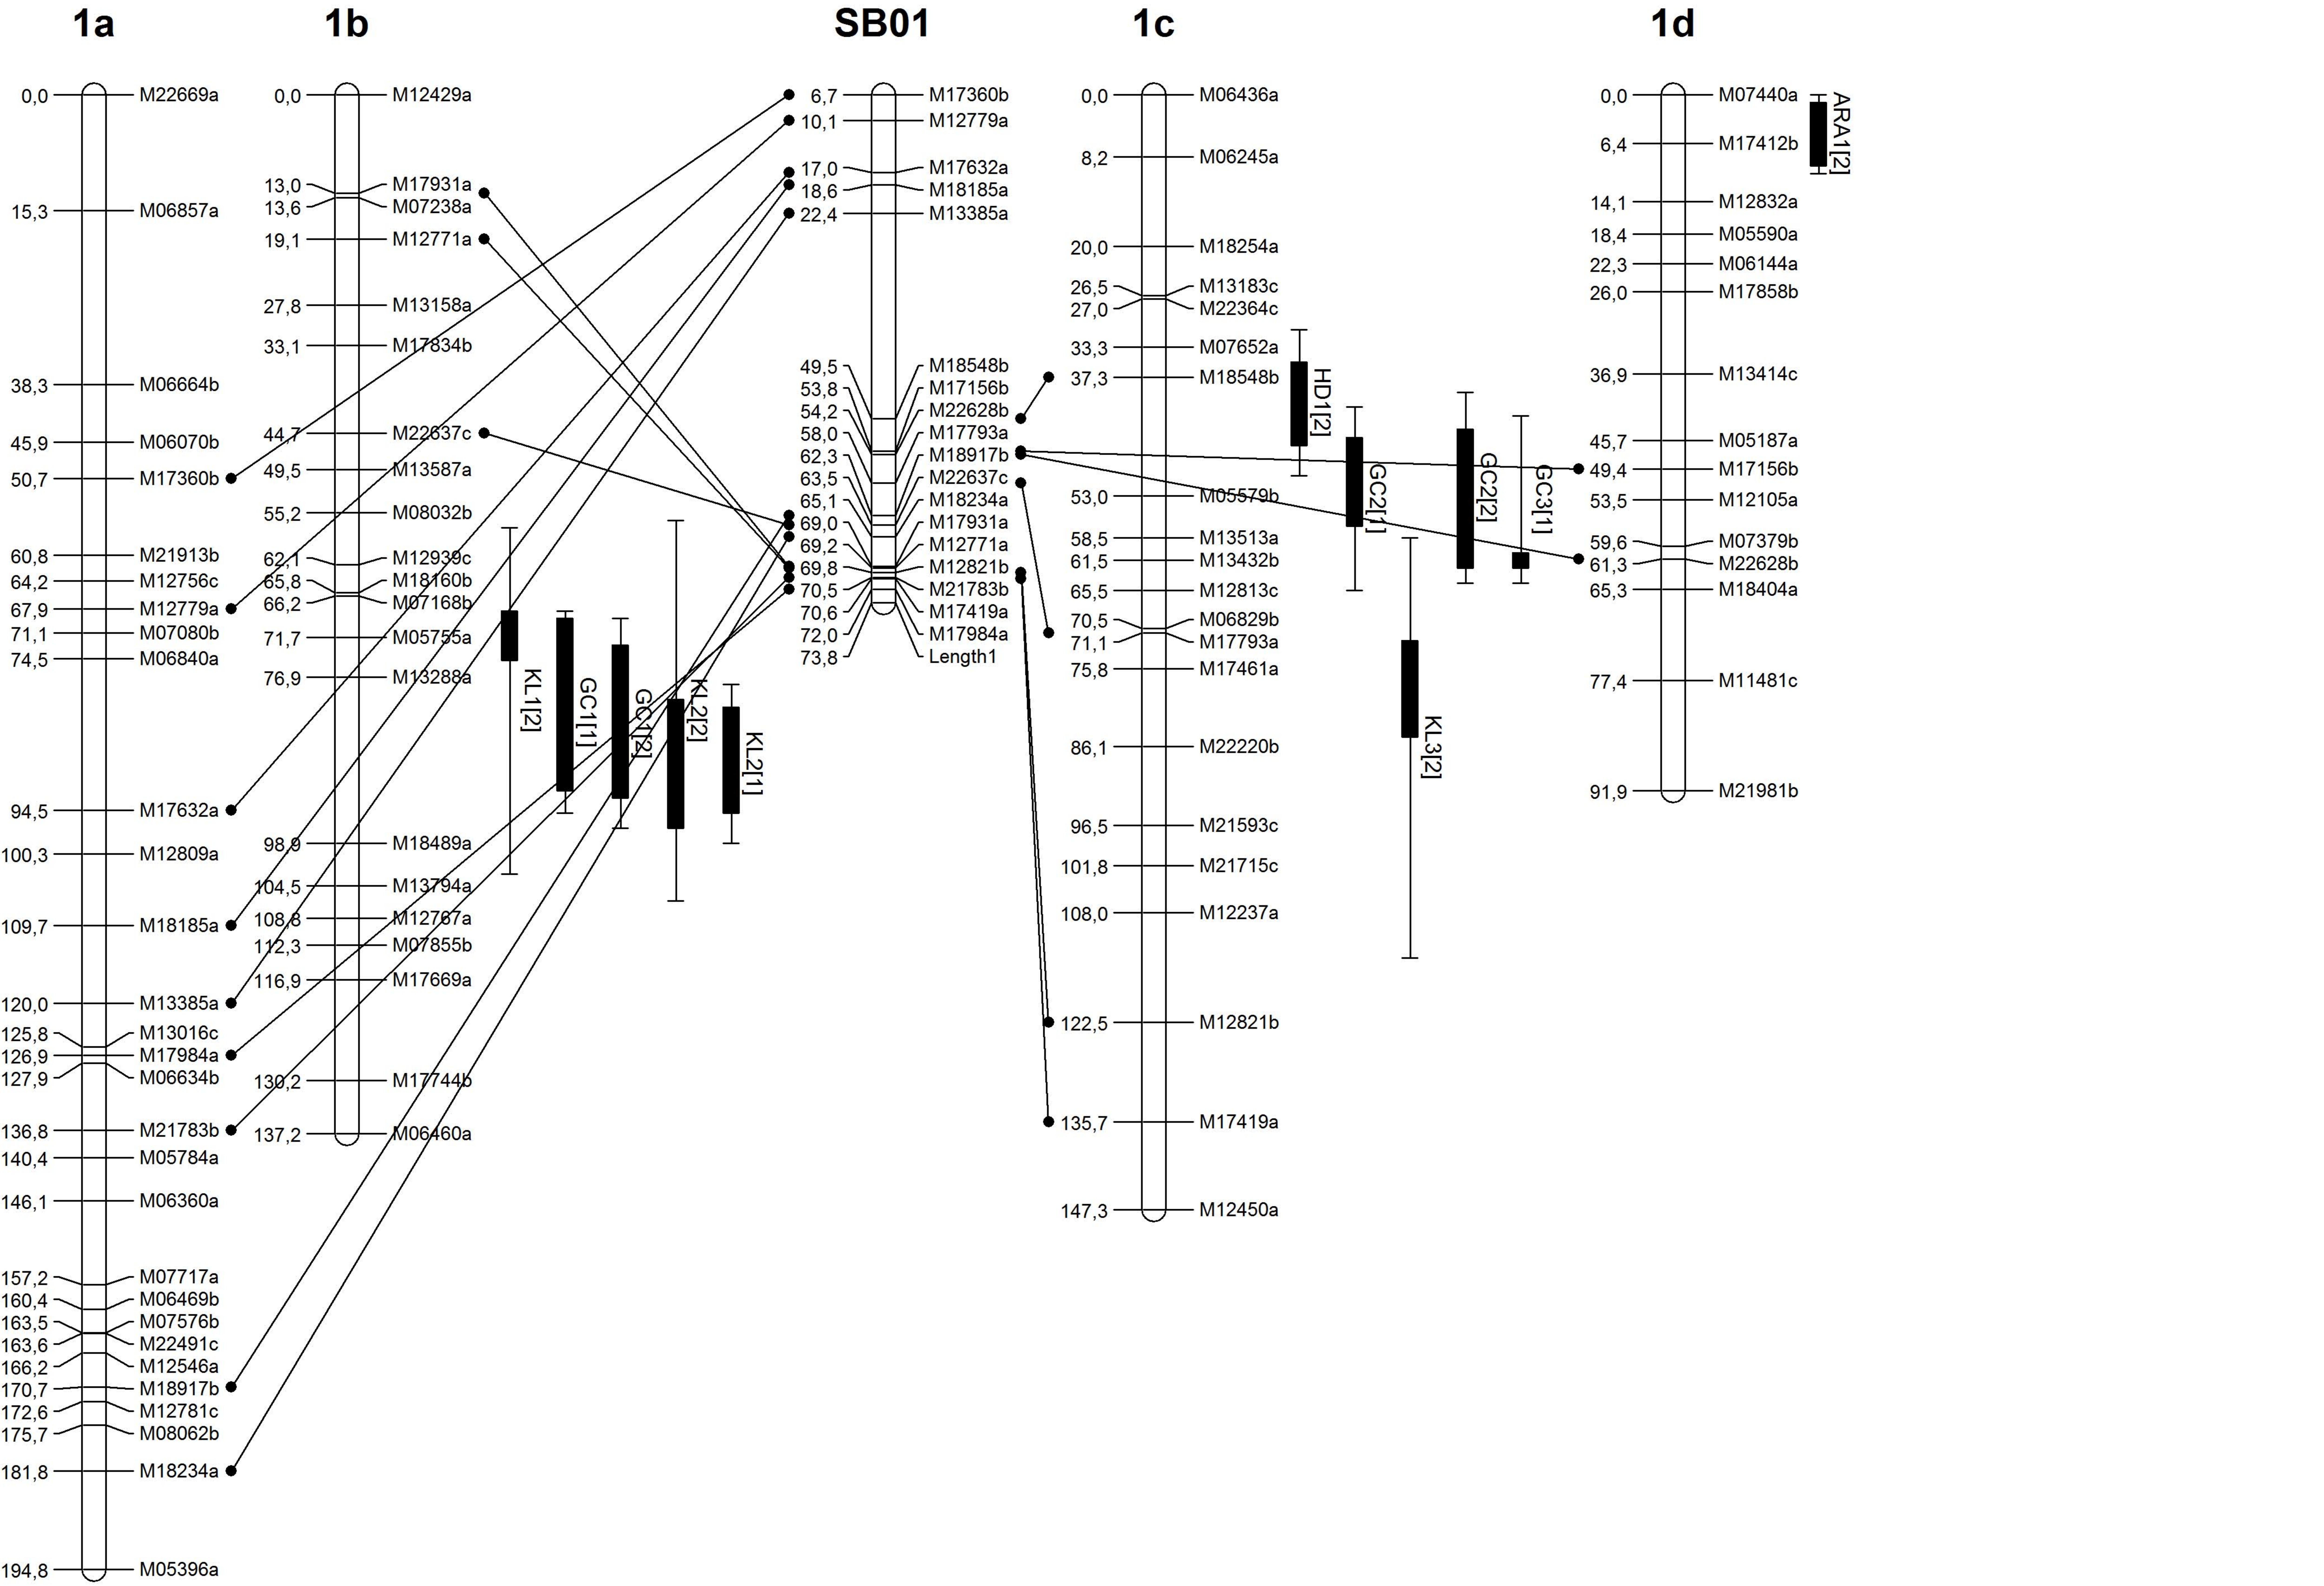

**2aR****2b****SB02****2cR****2d**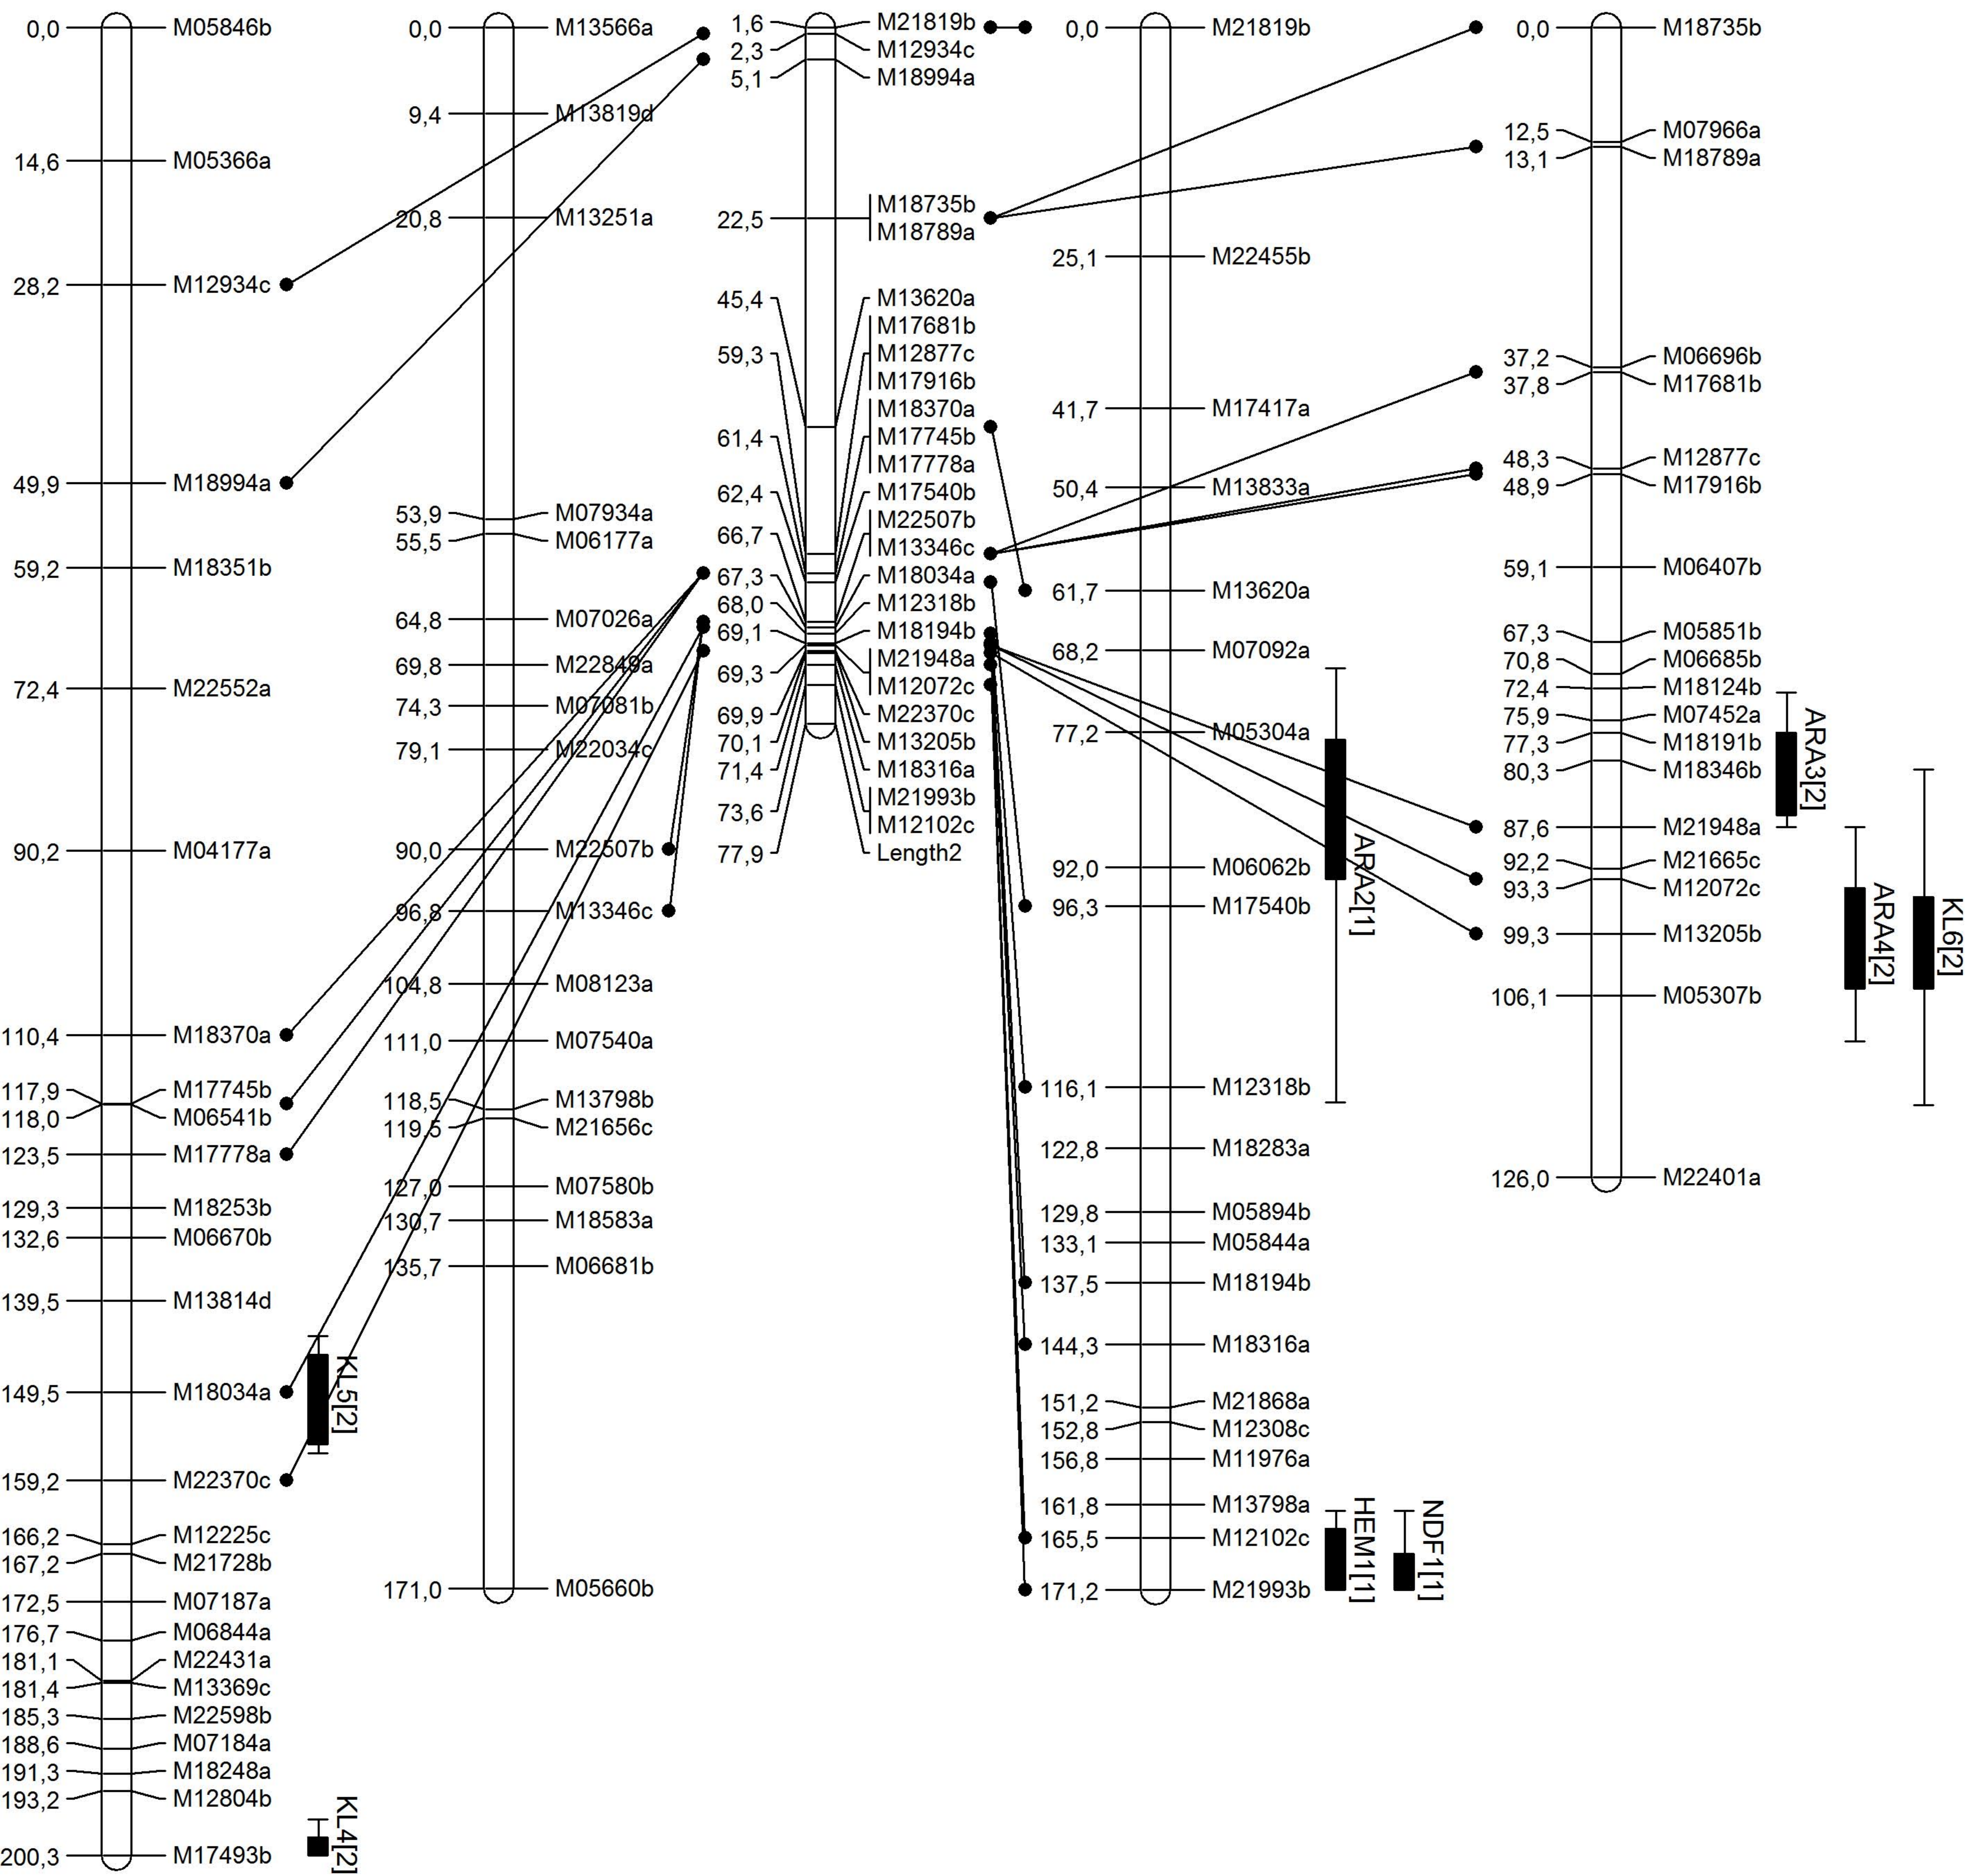

**3aR**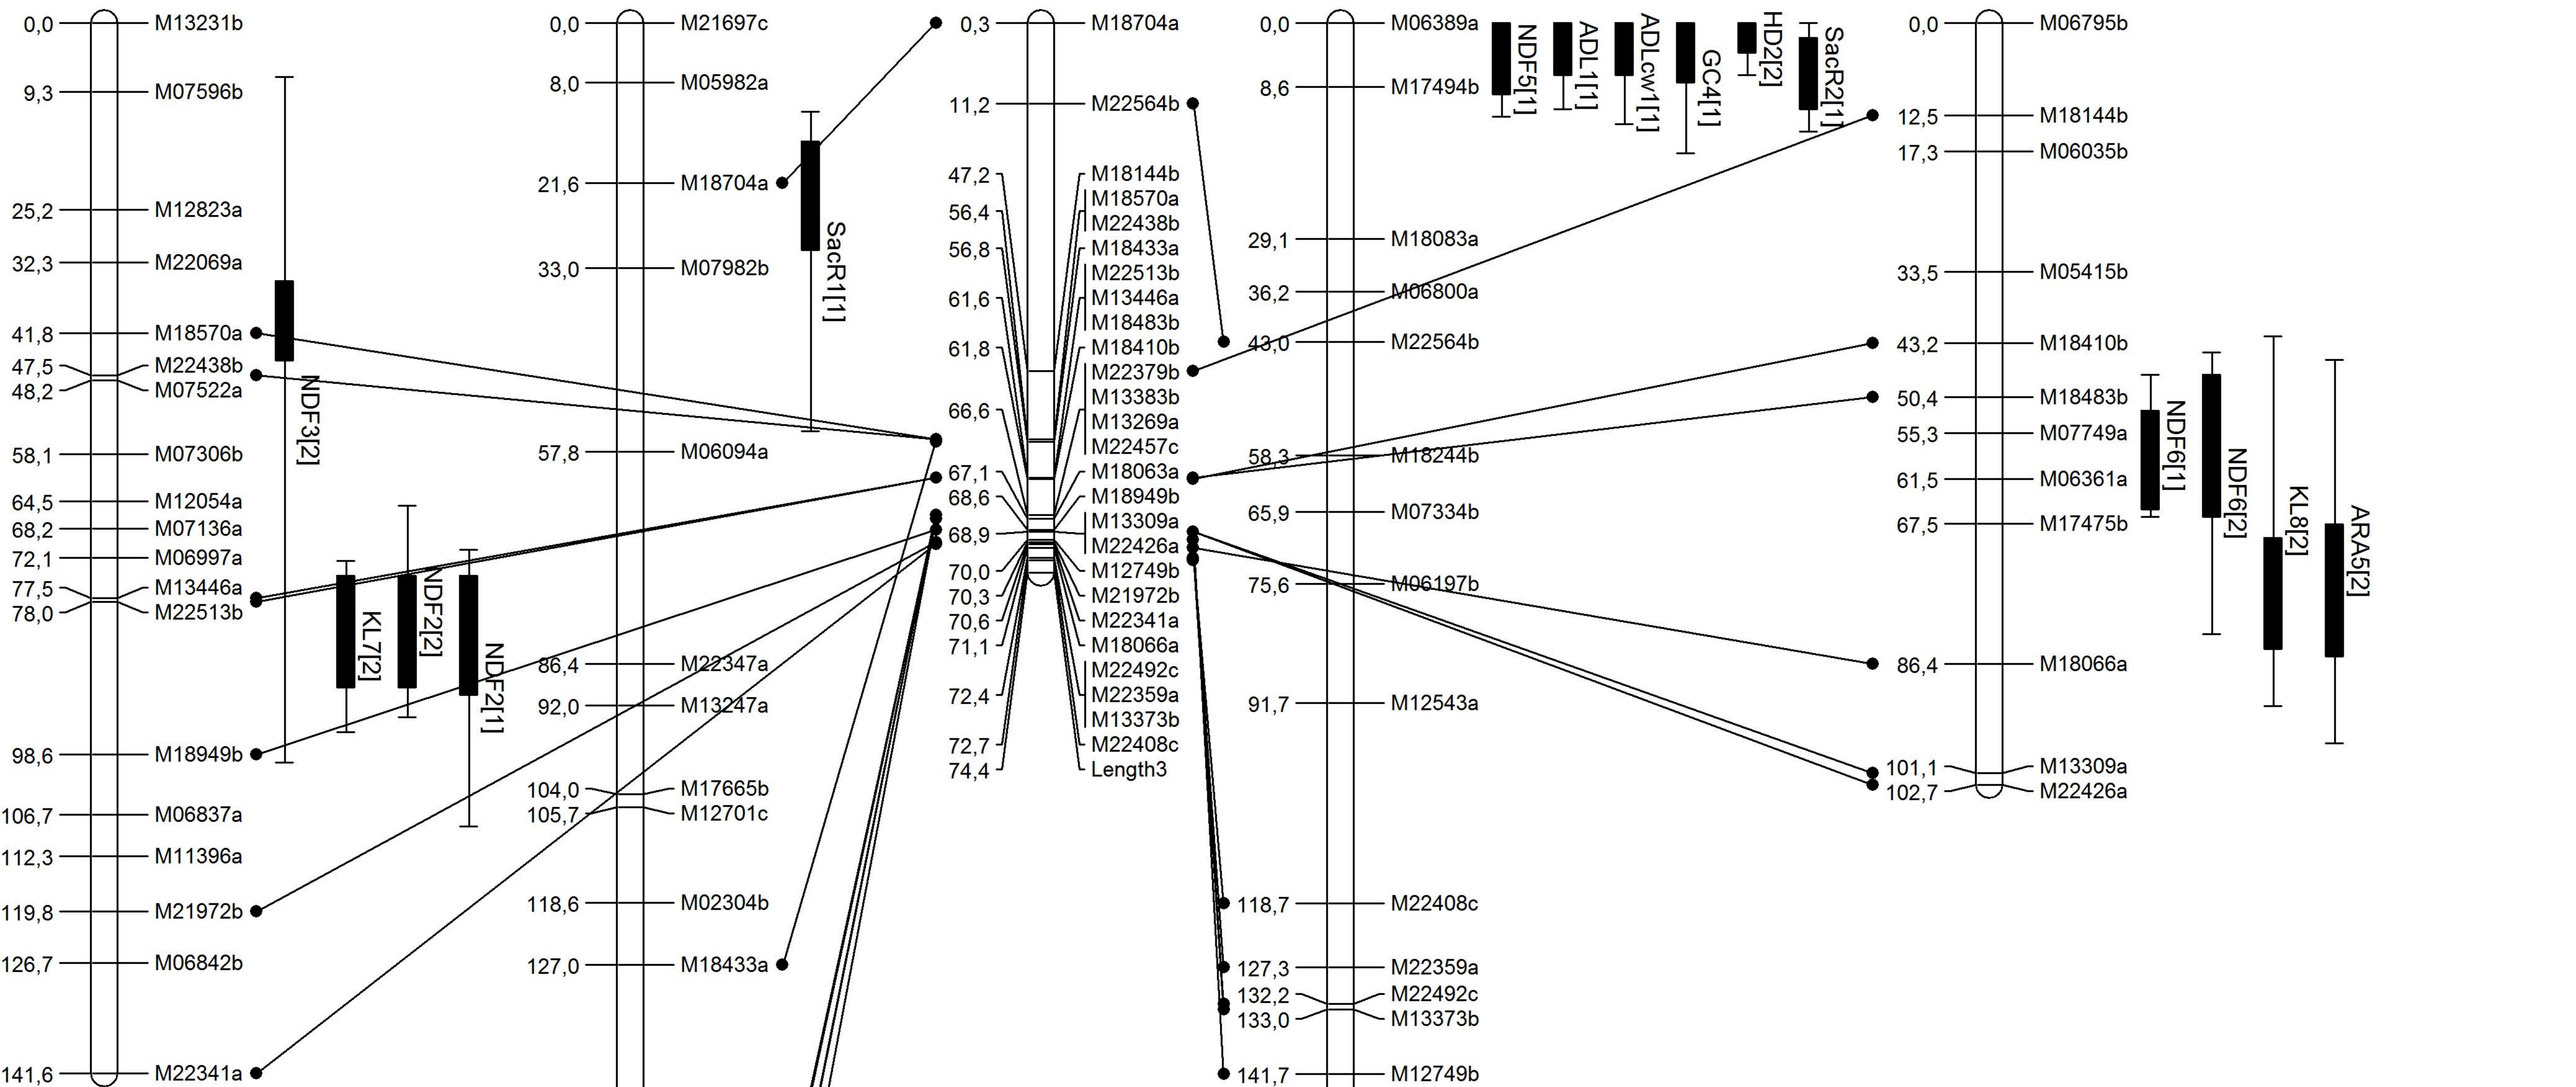**3b**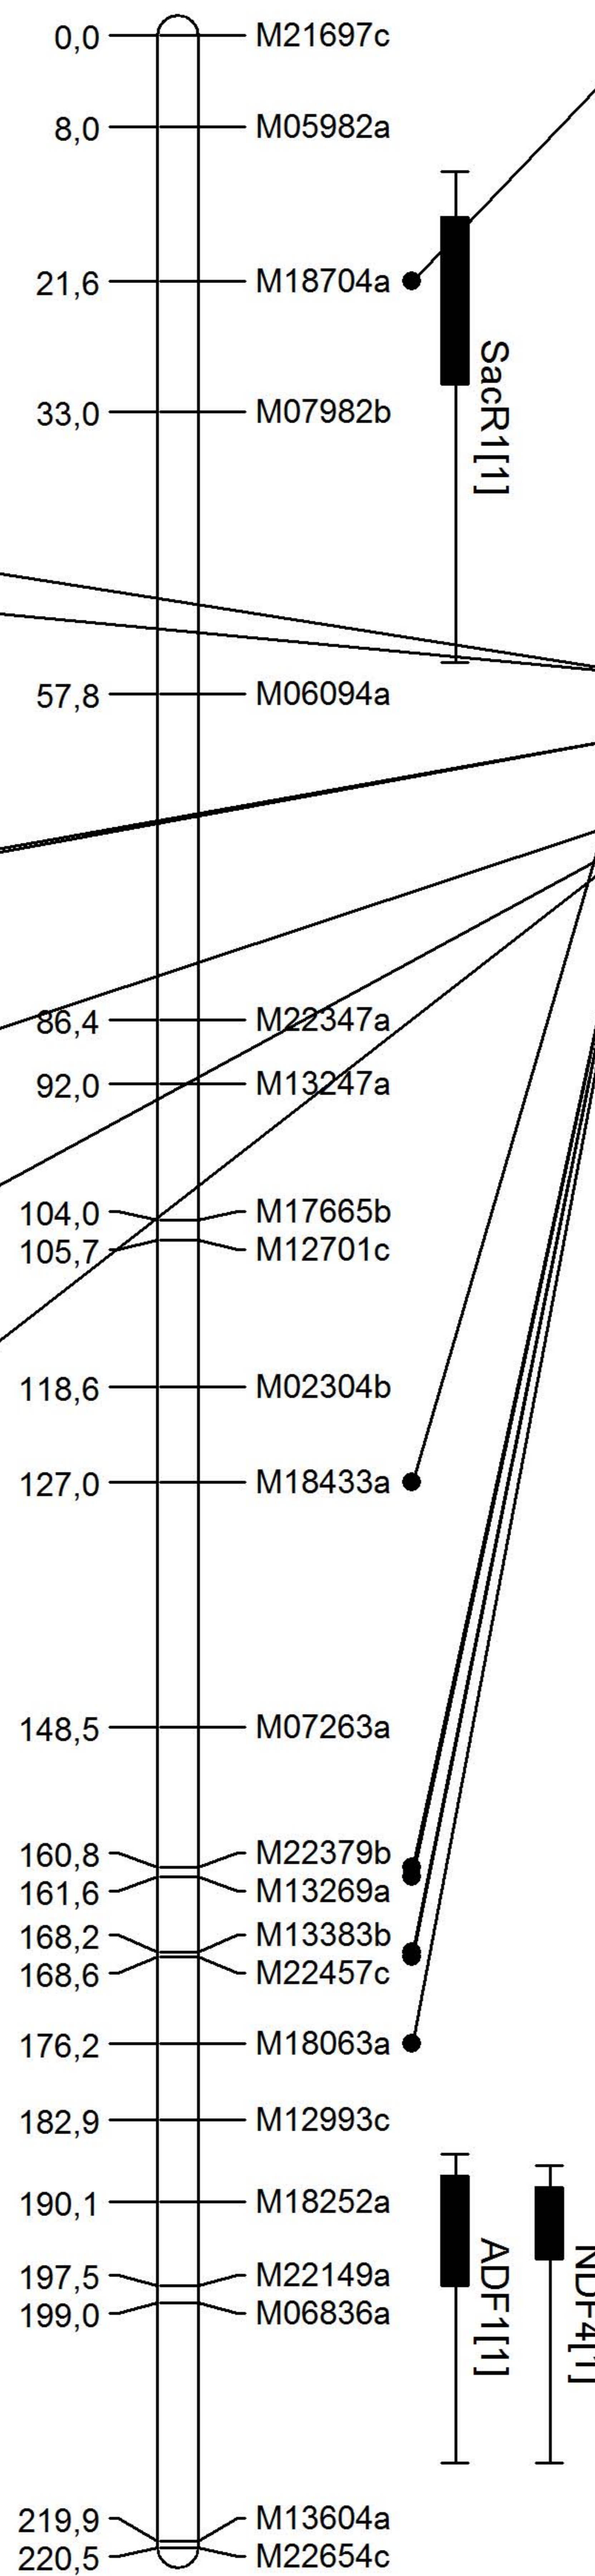**SB03**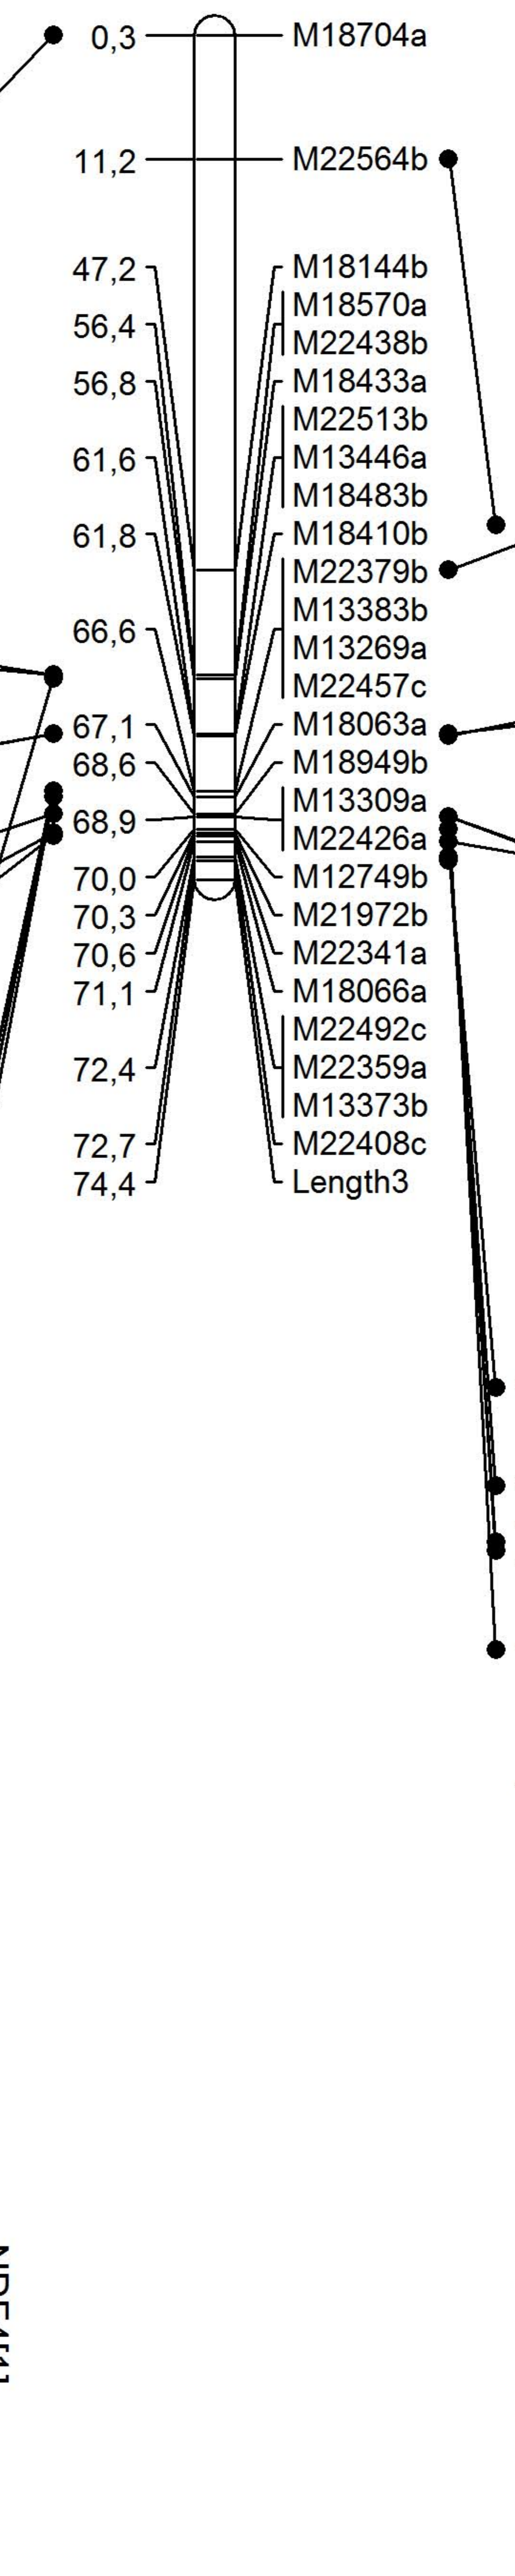**3c**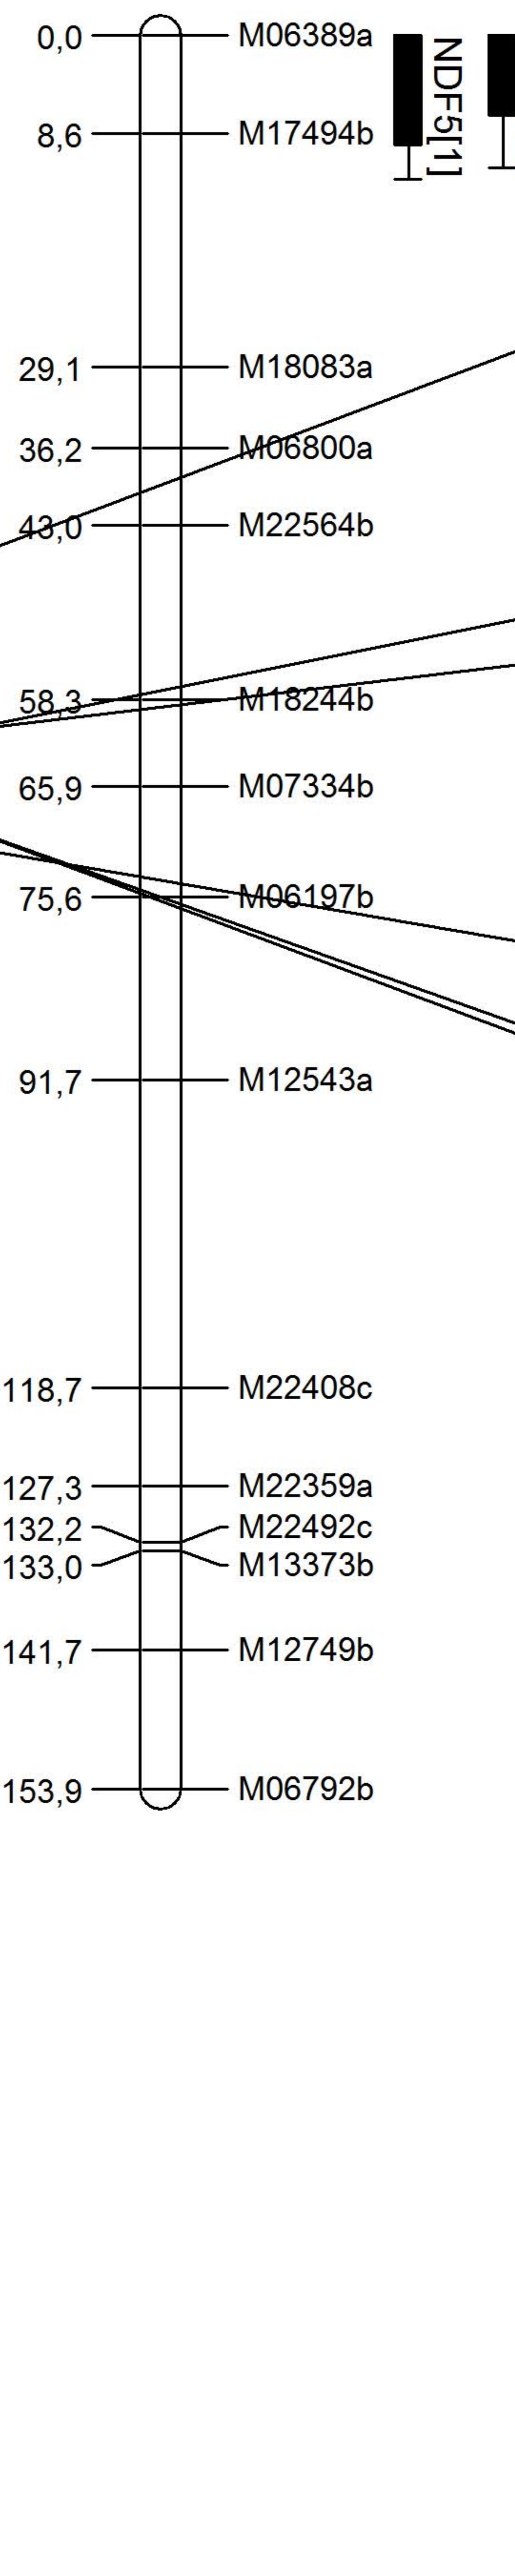**3dR**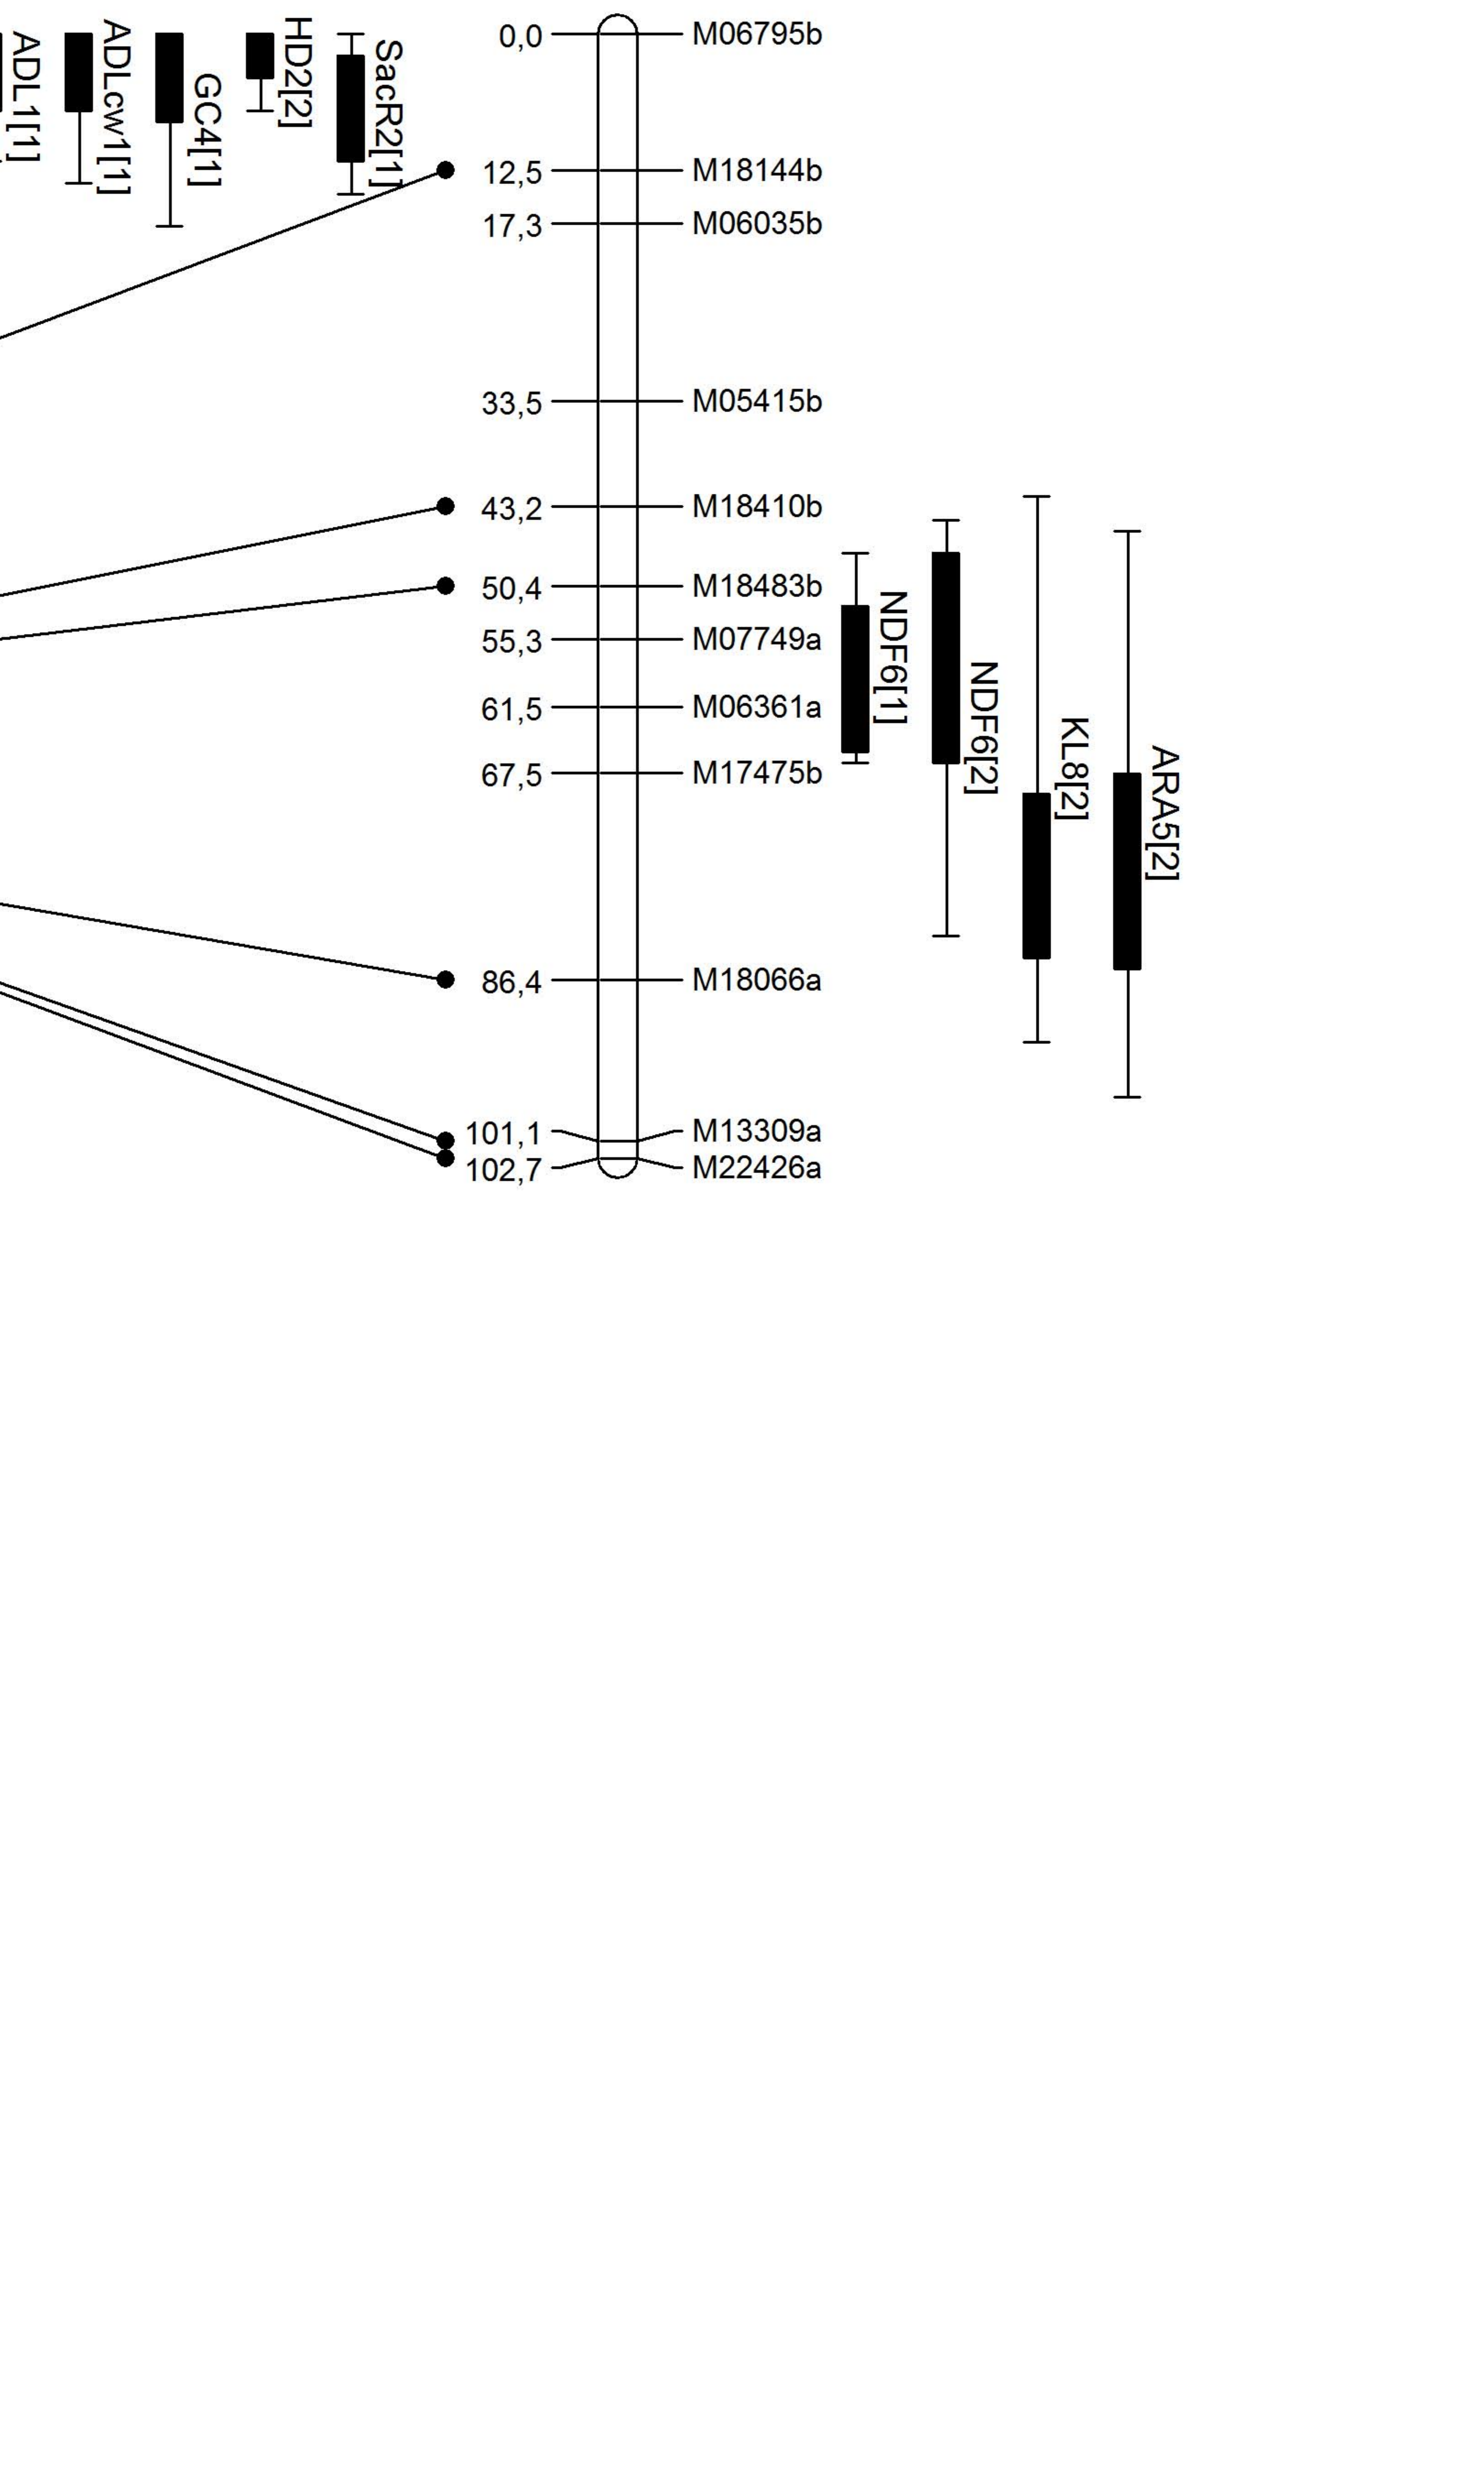

**4a**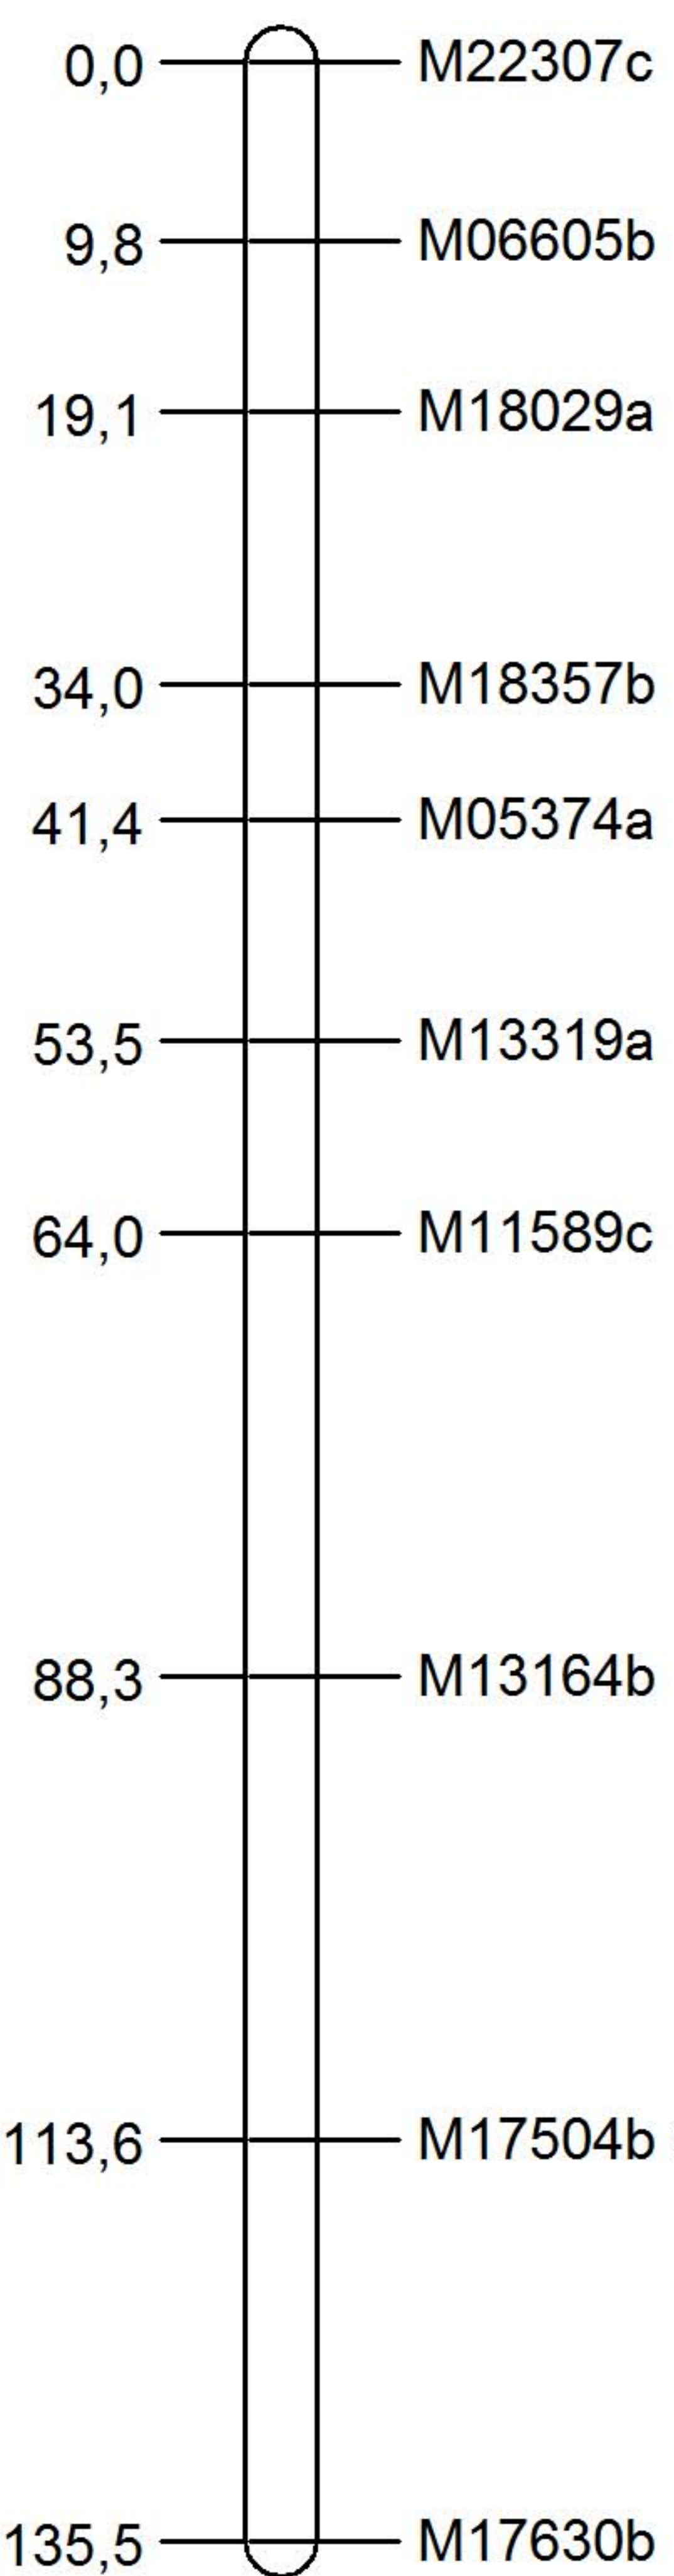**4b7b**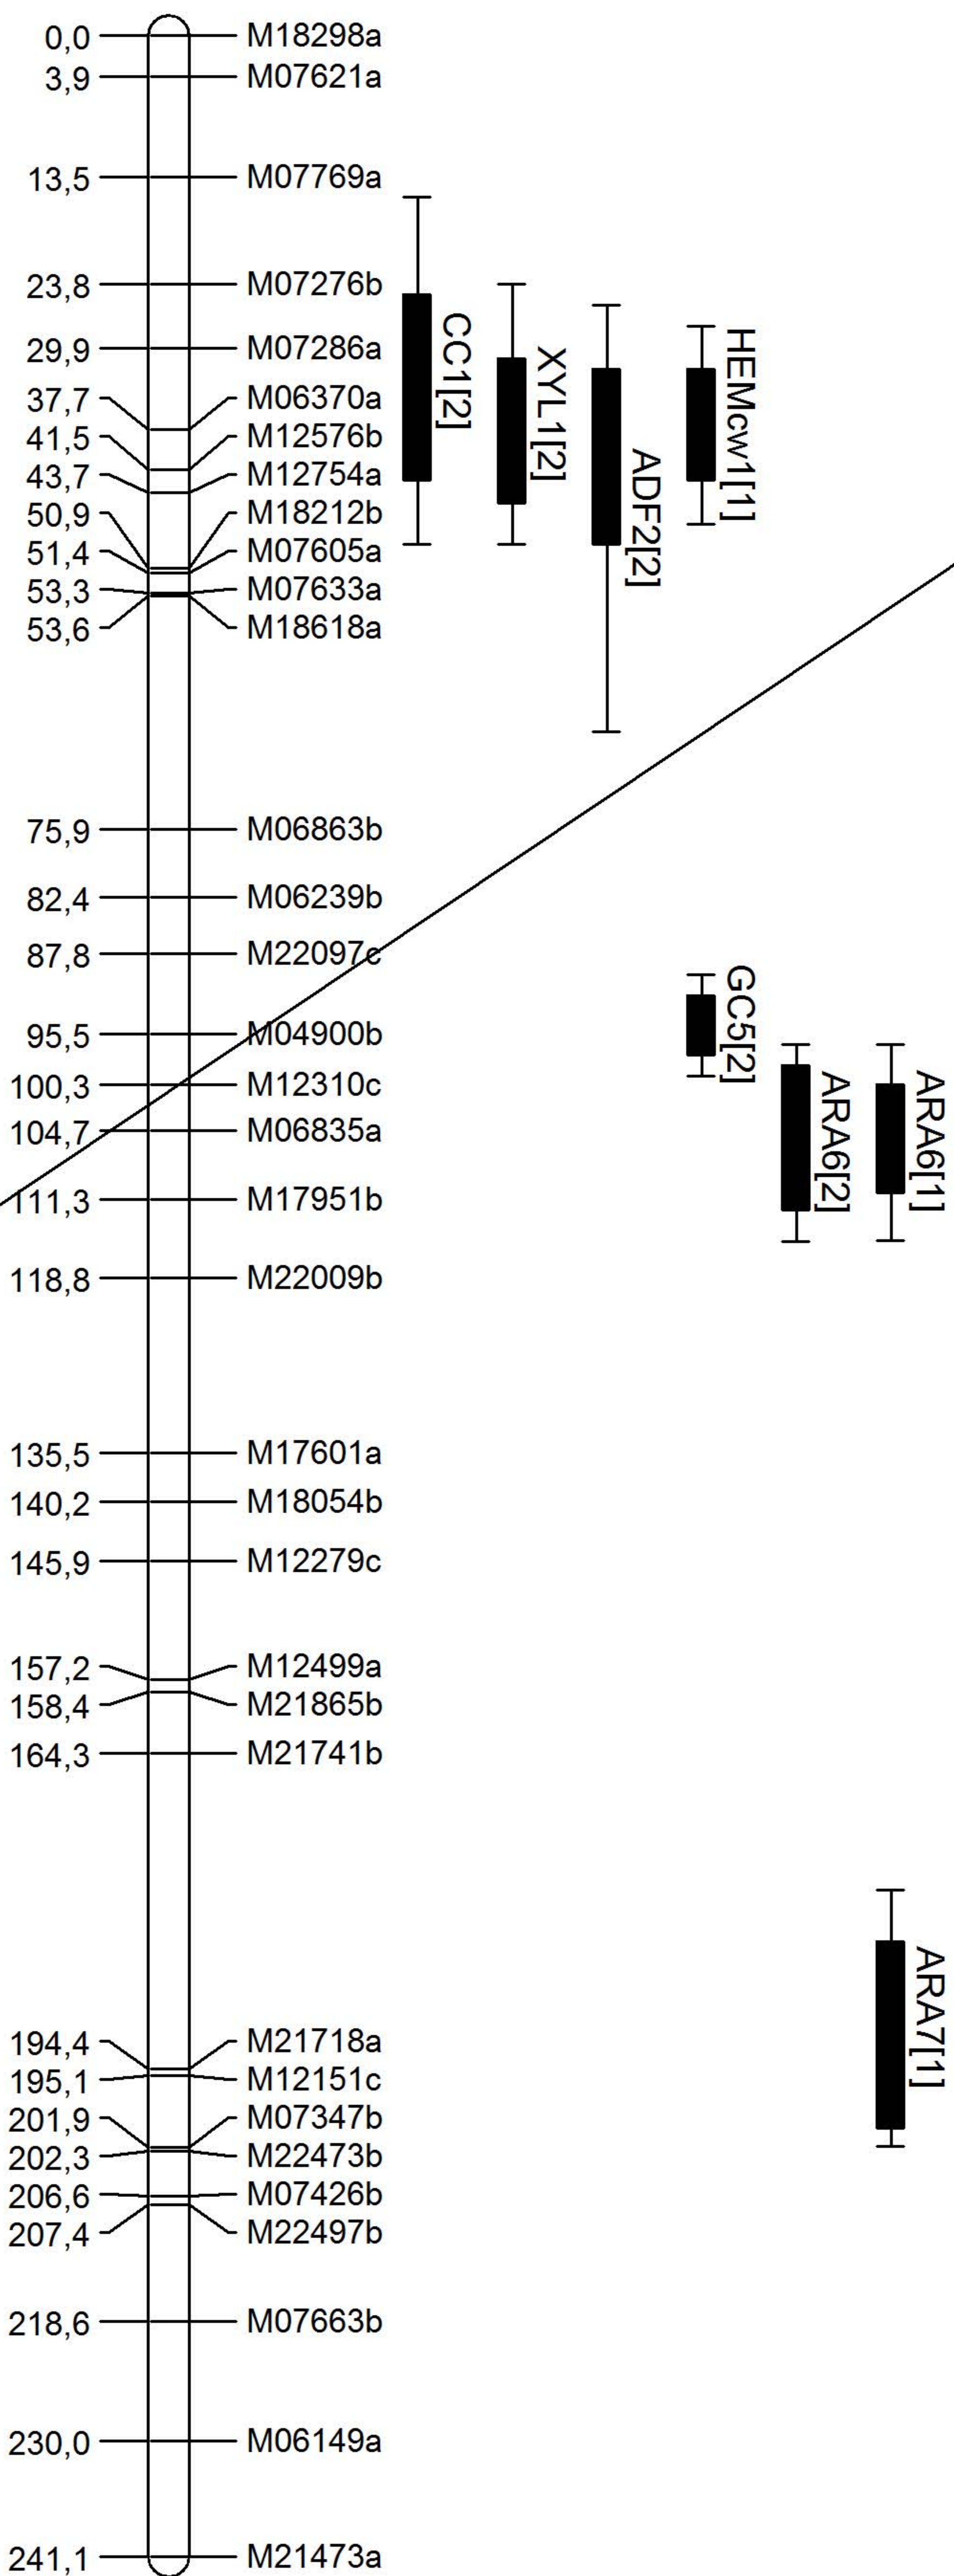**SB04**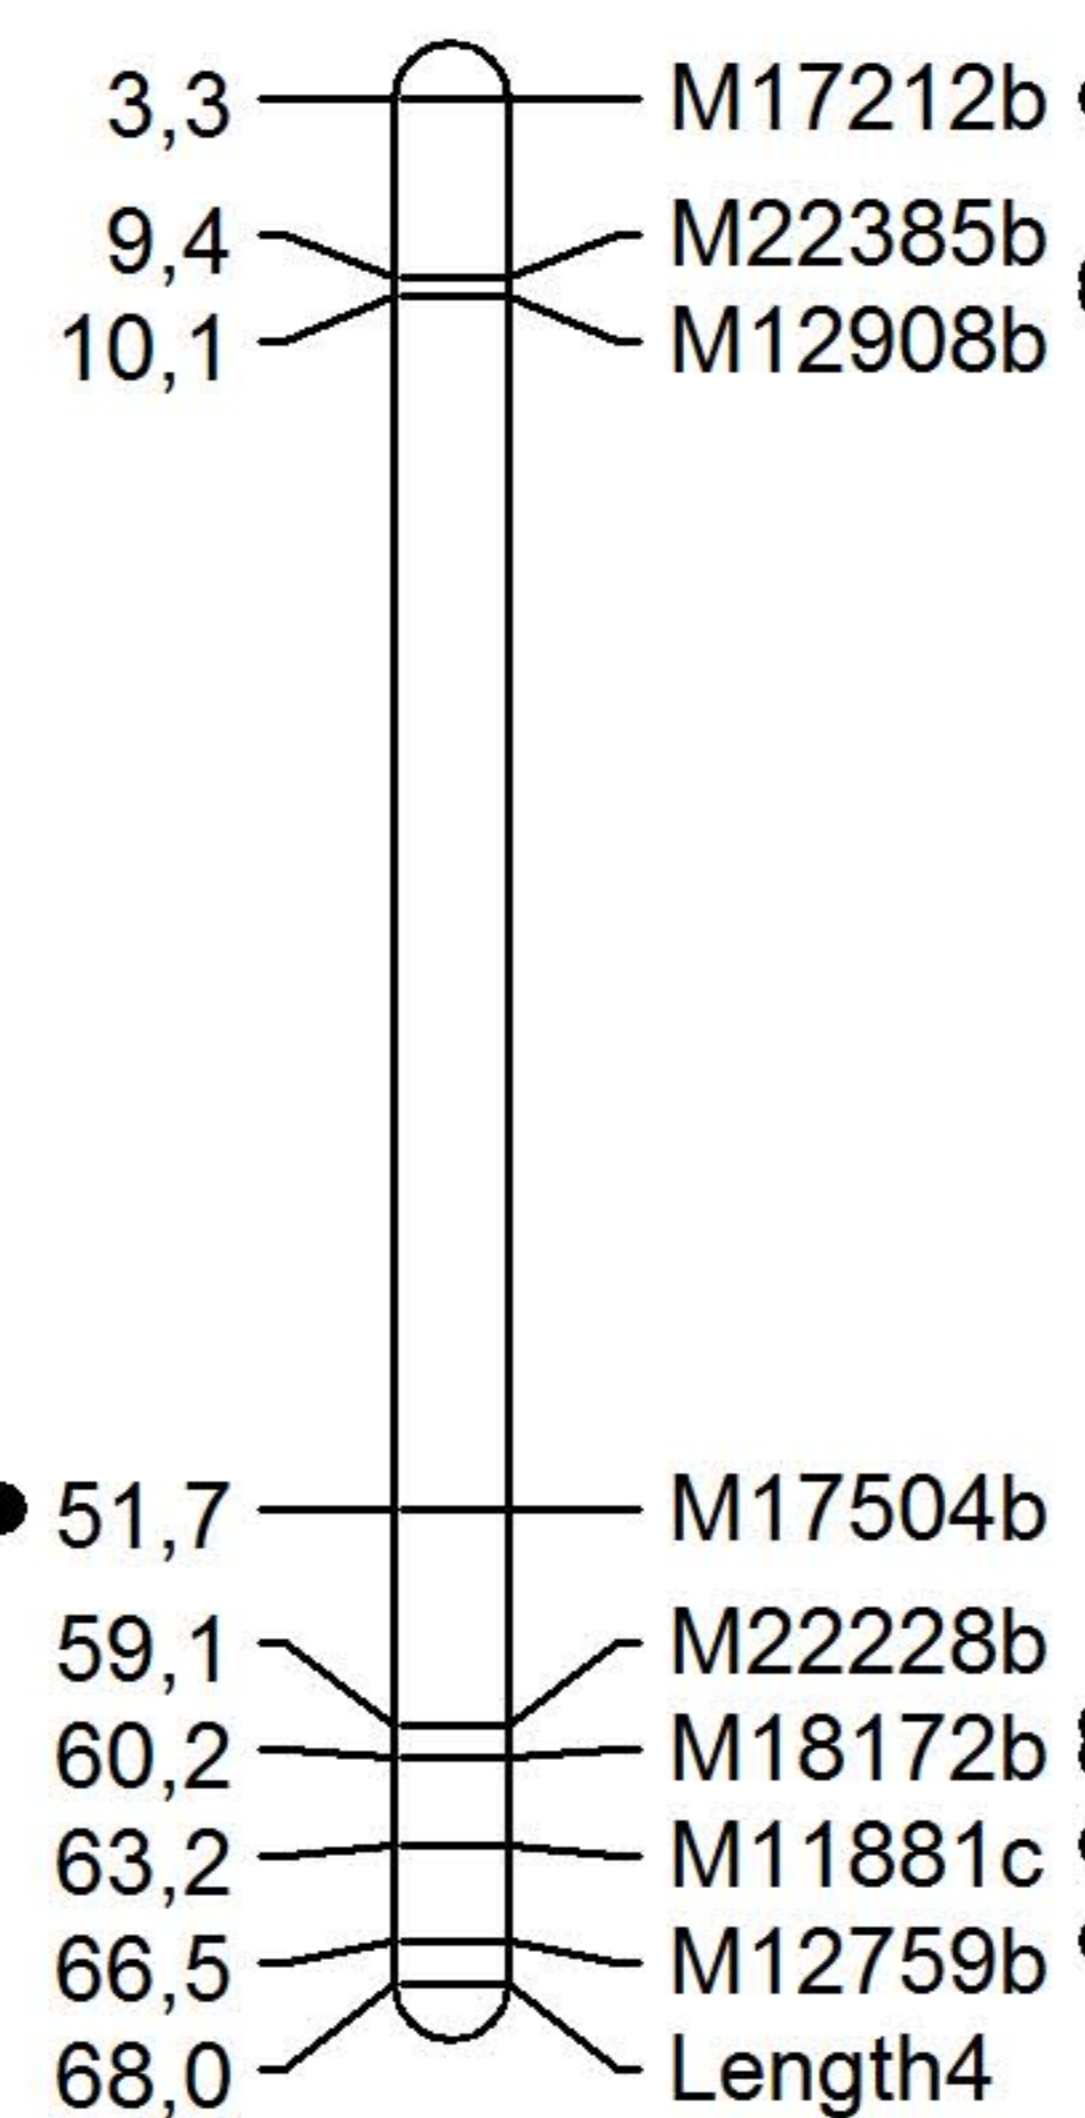**4c**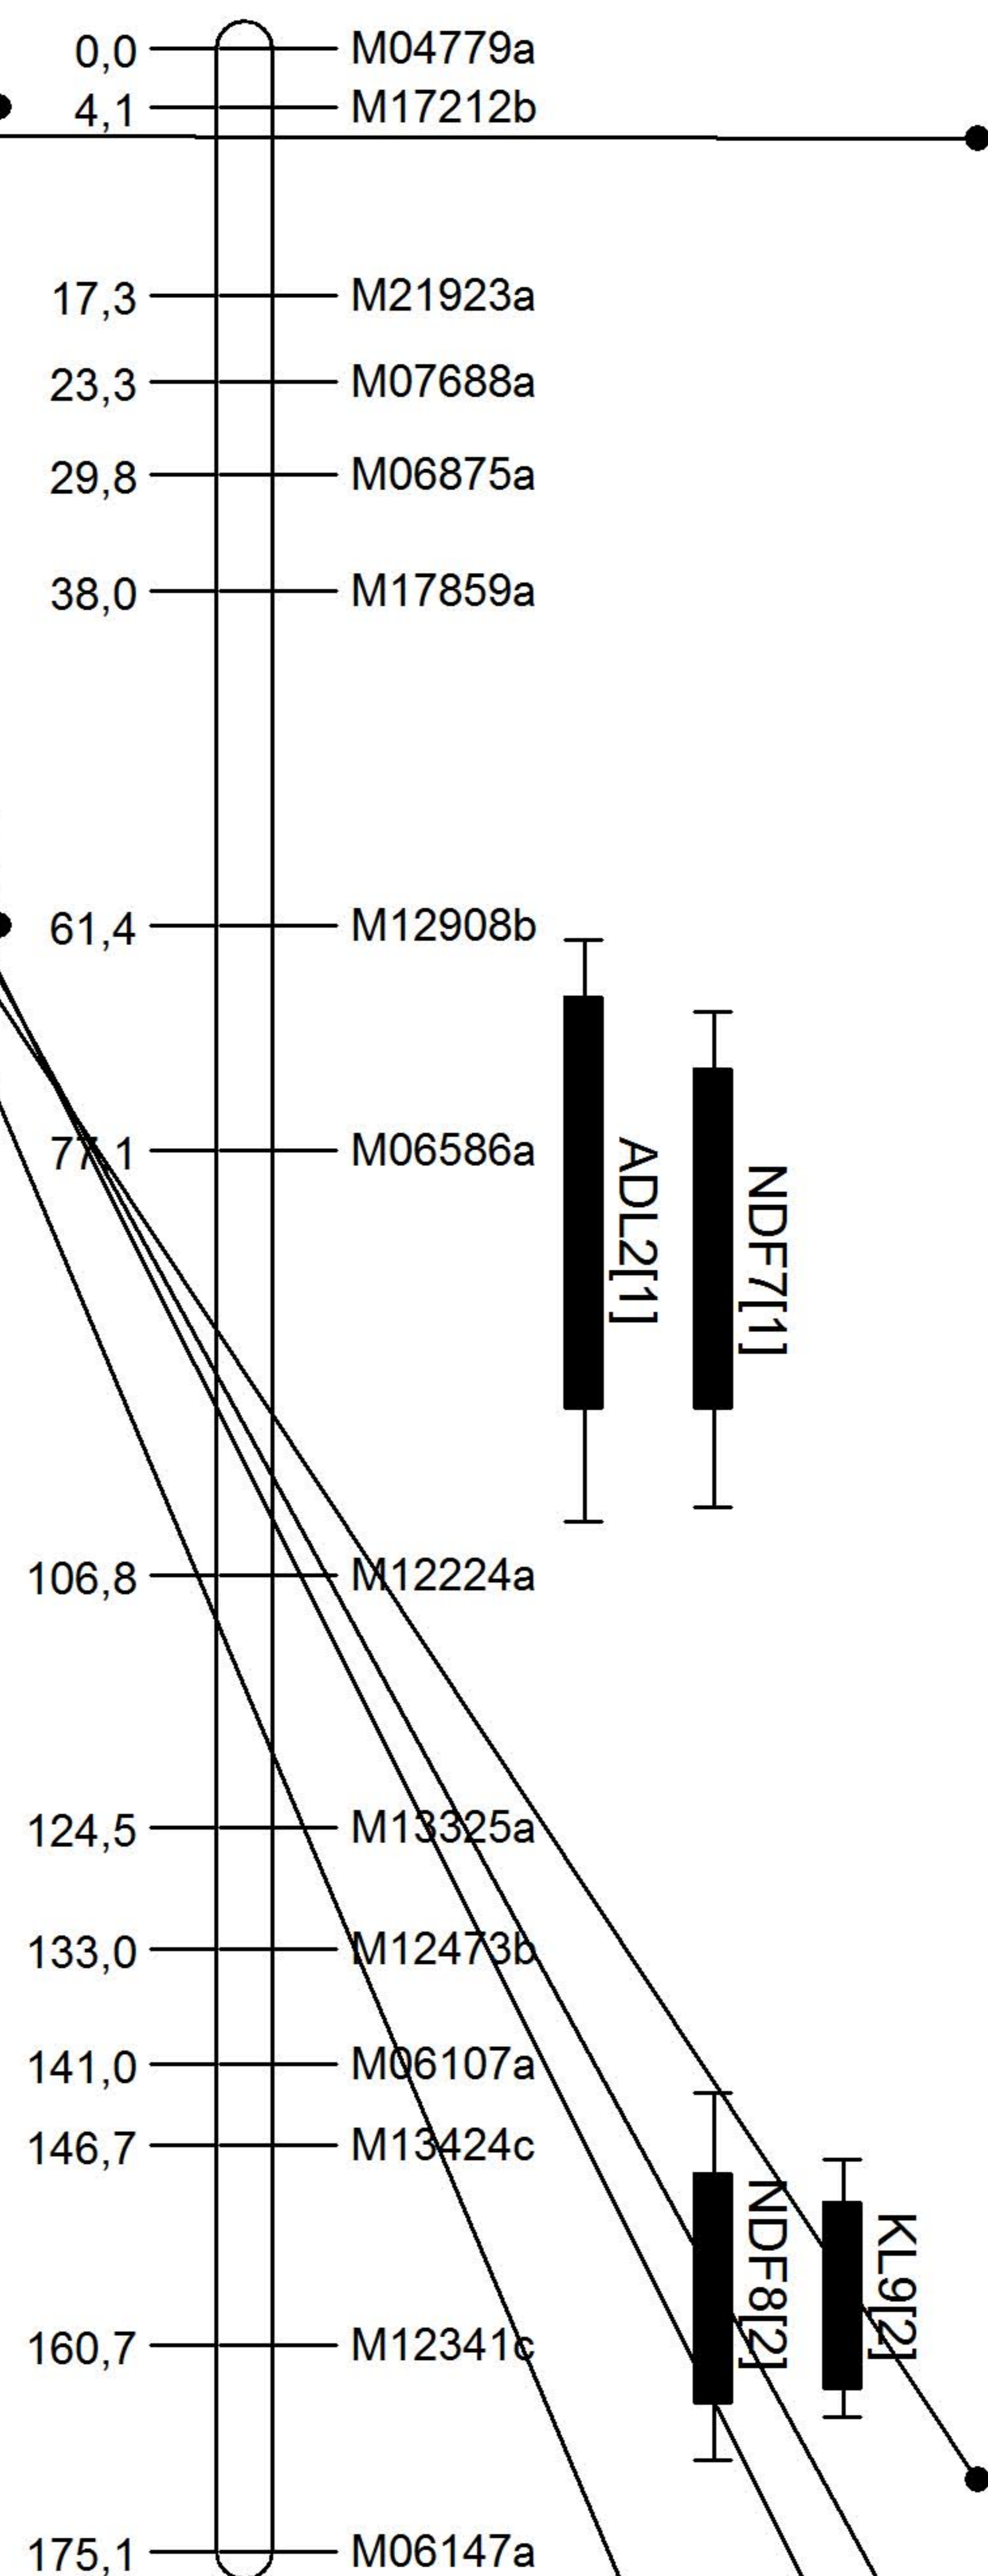**4d7dR**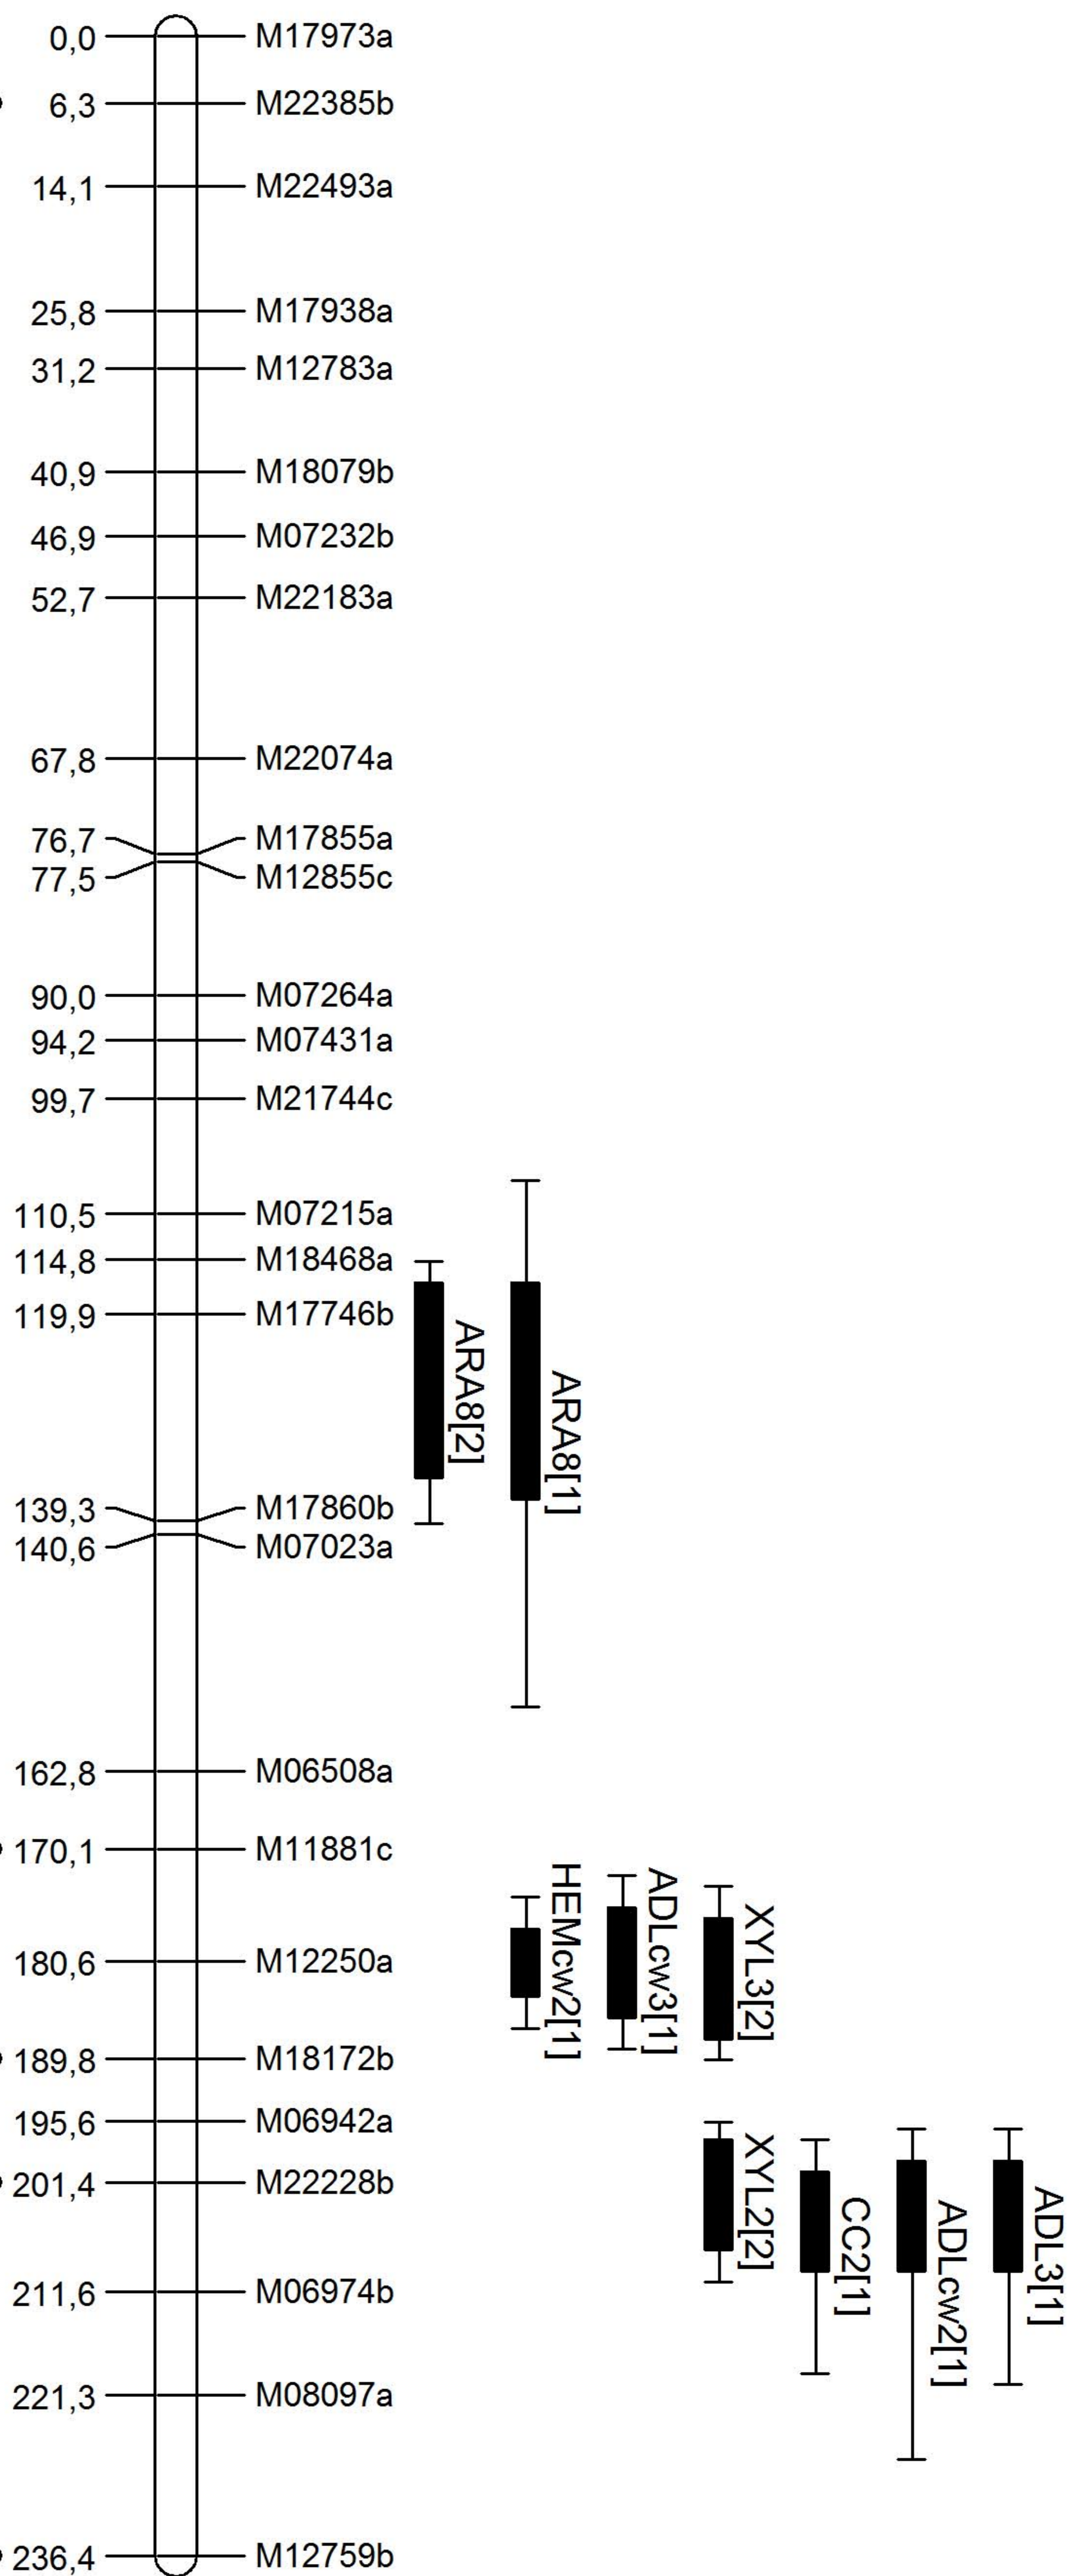

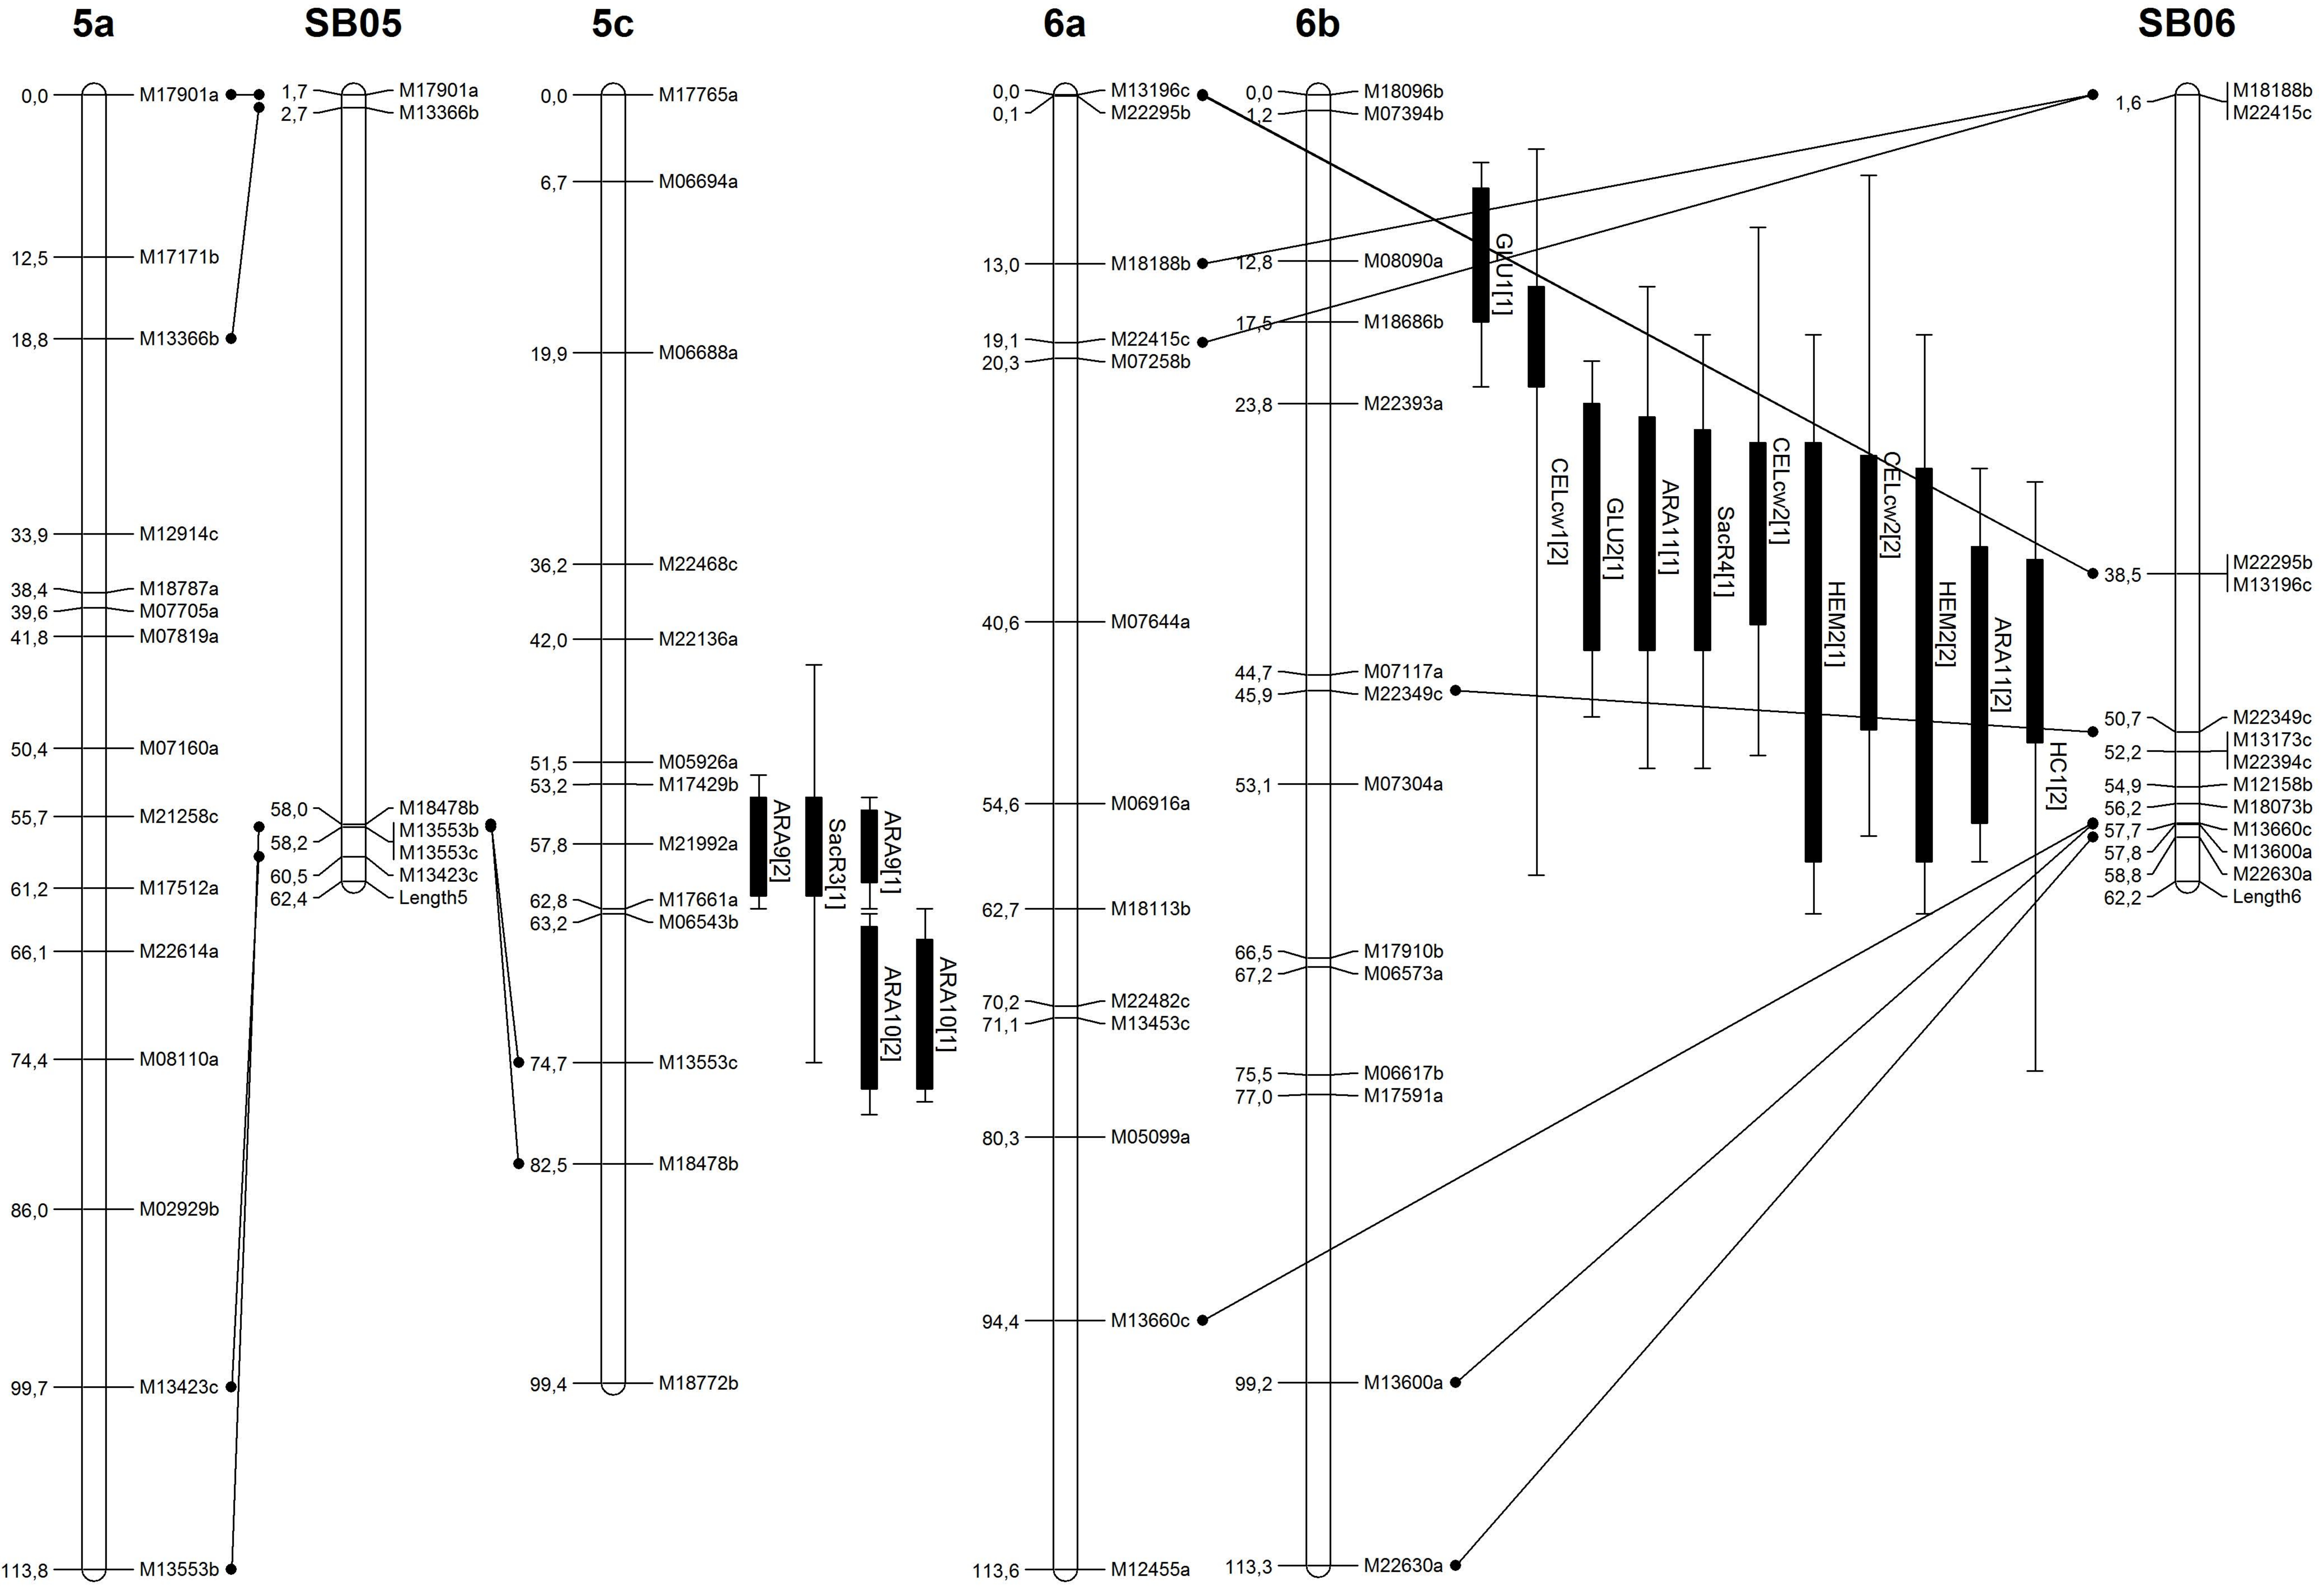

**SB06****6c****6d**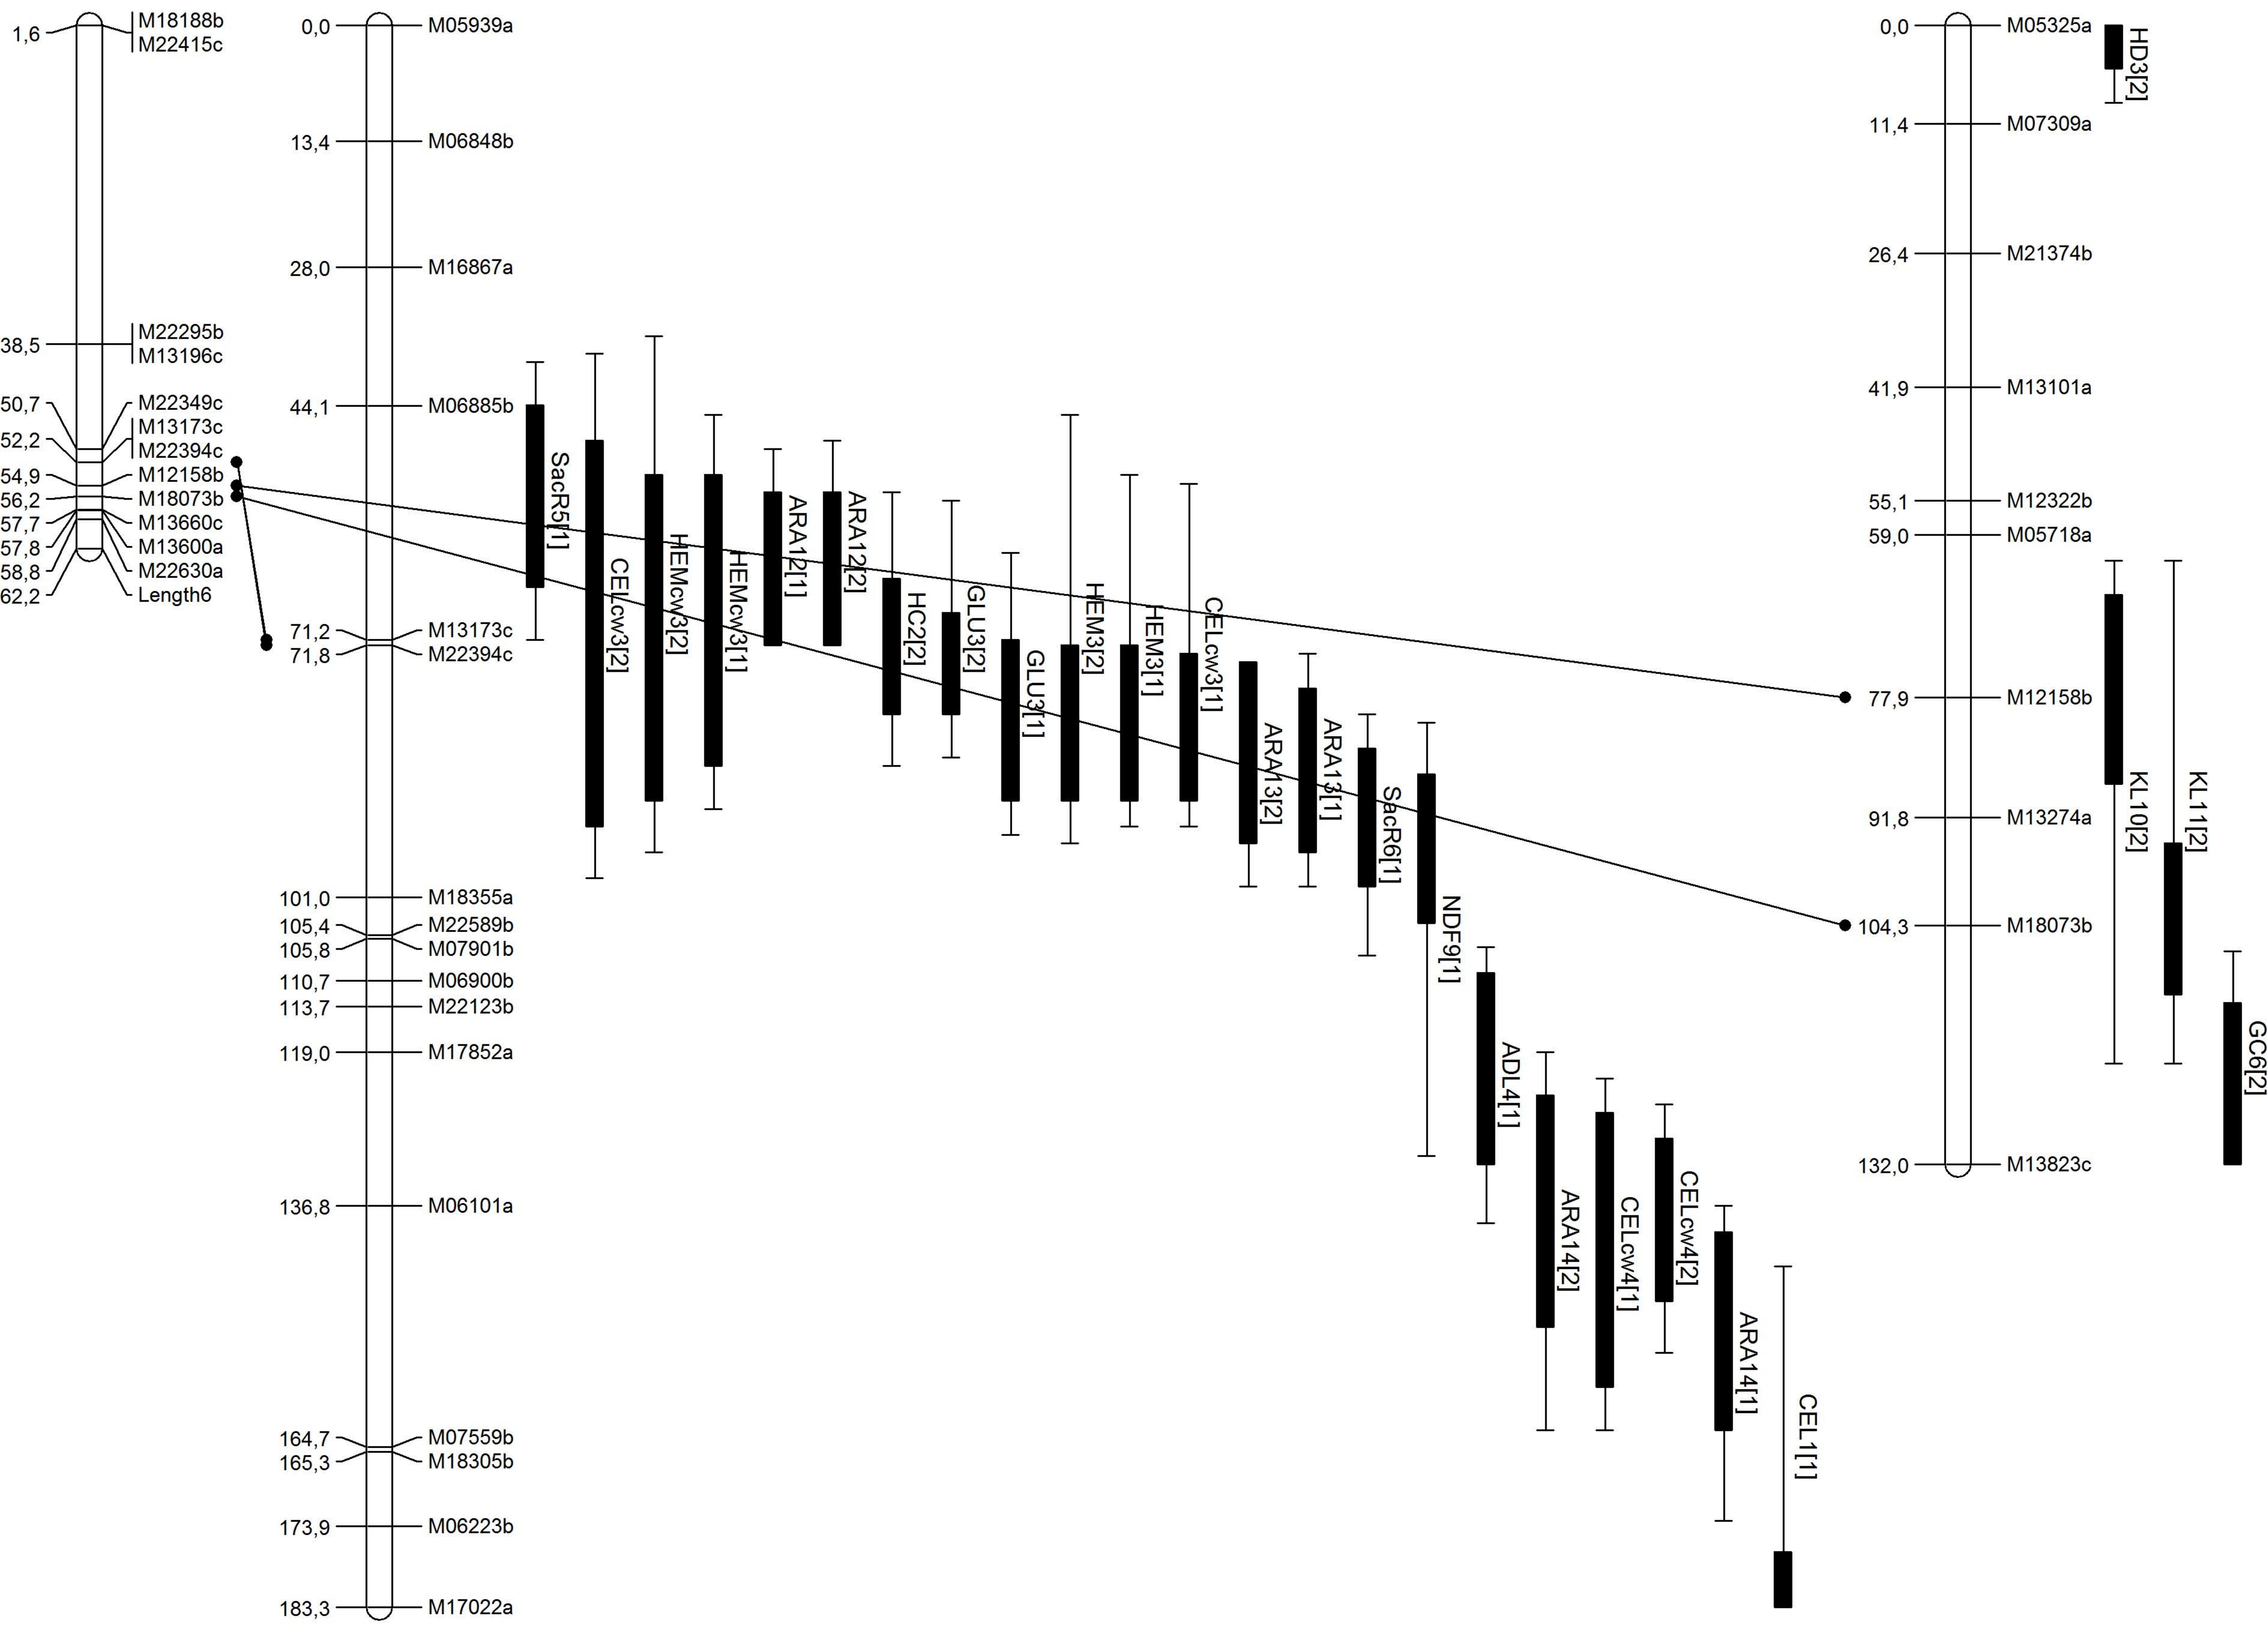

**7aR**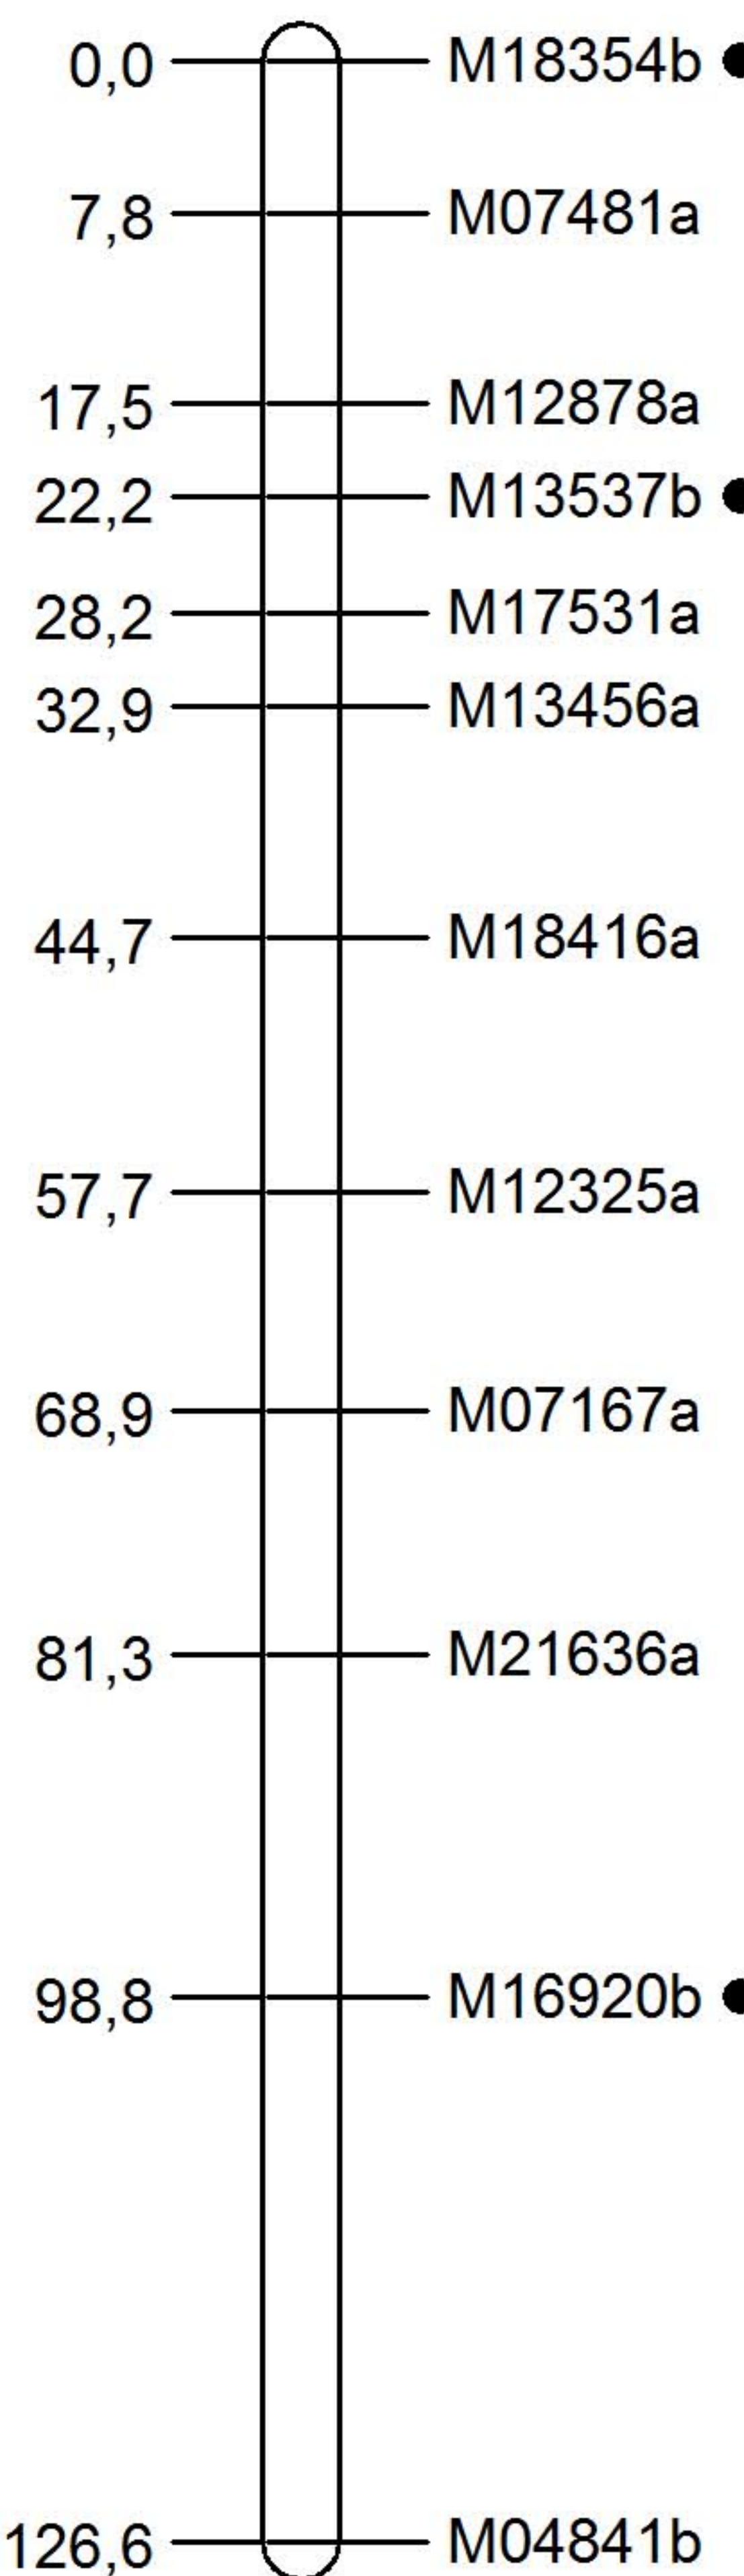**4b7b**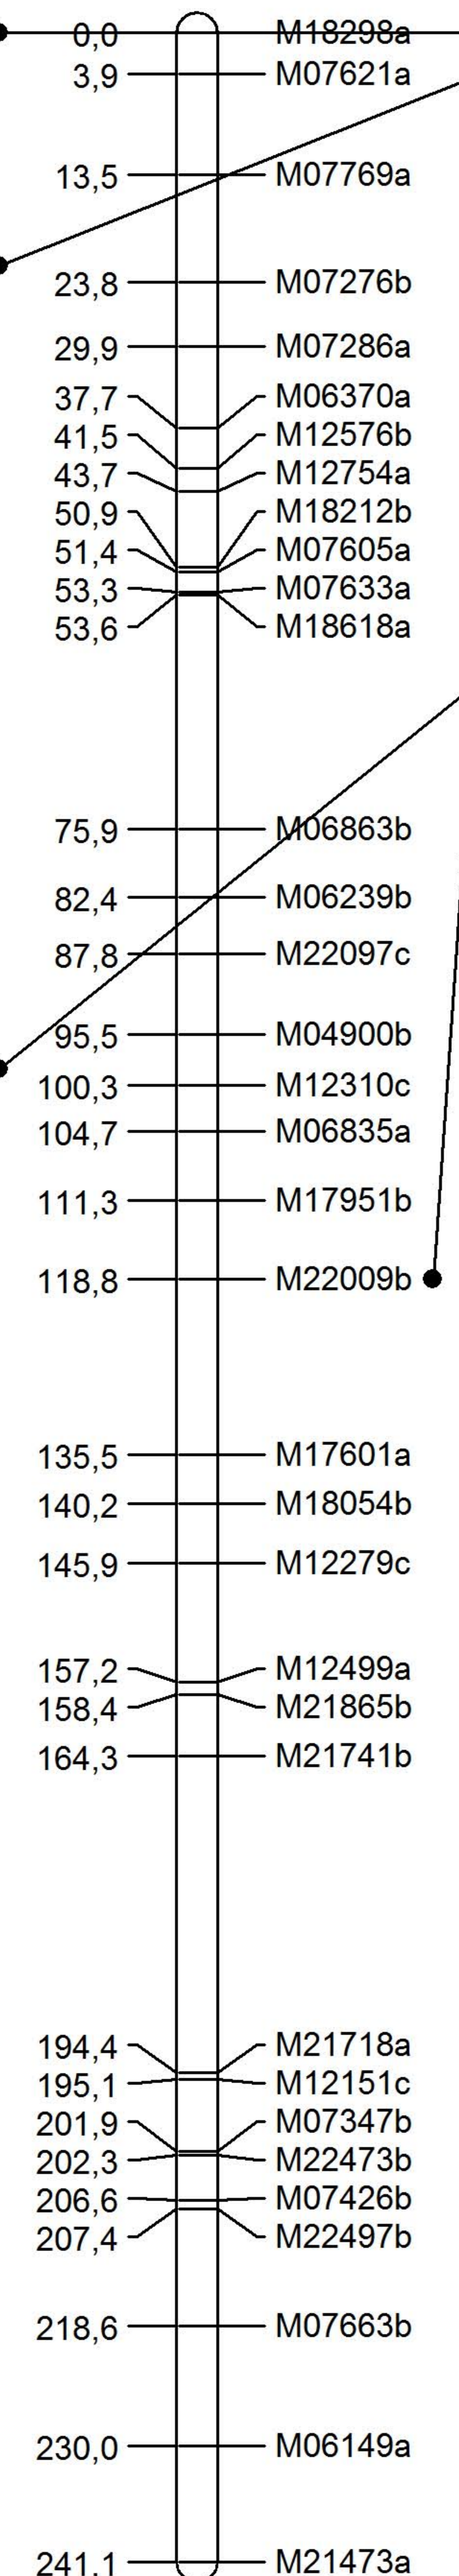**SB07**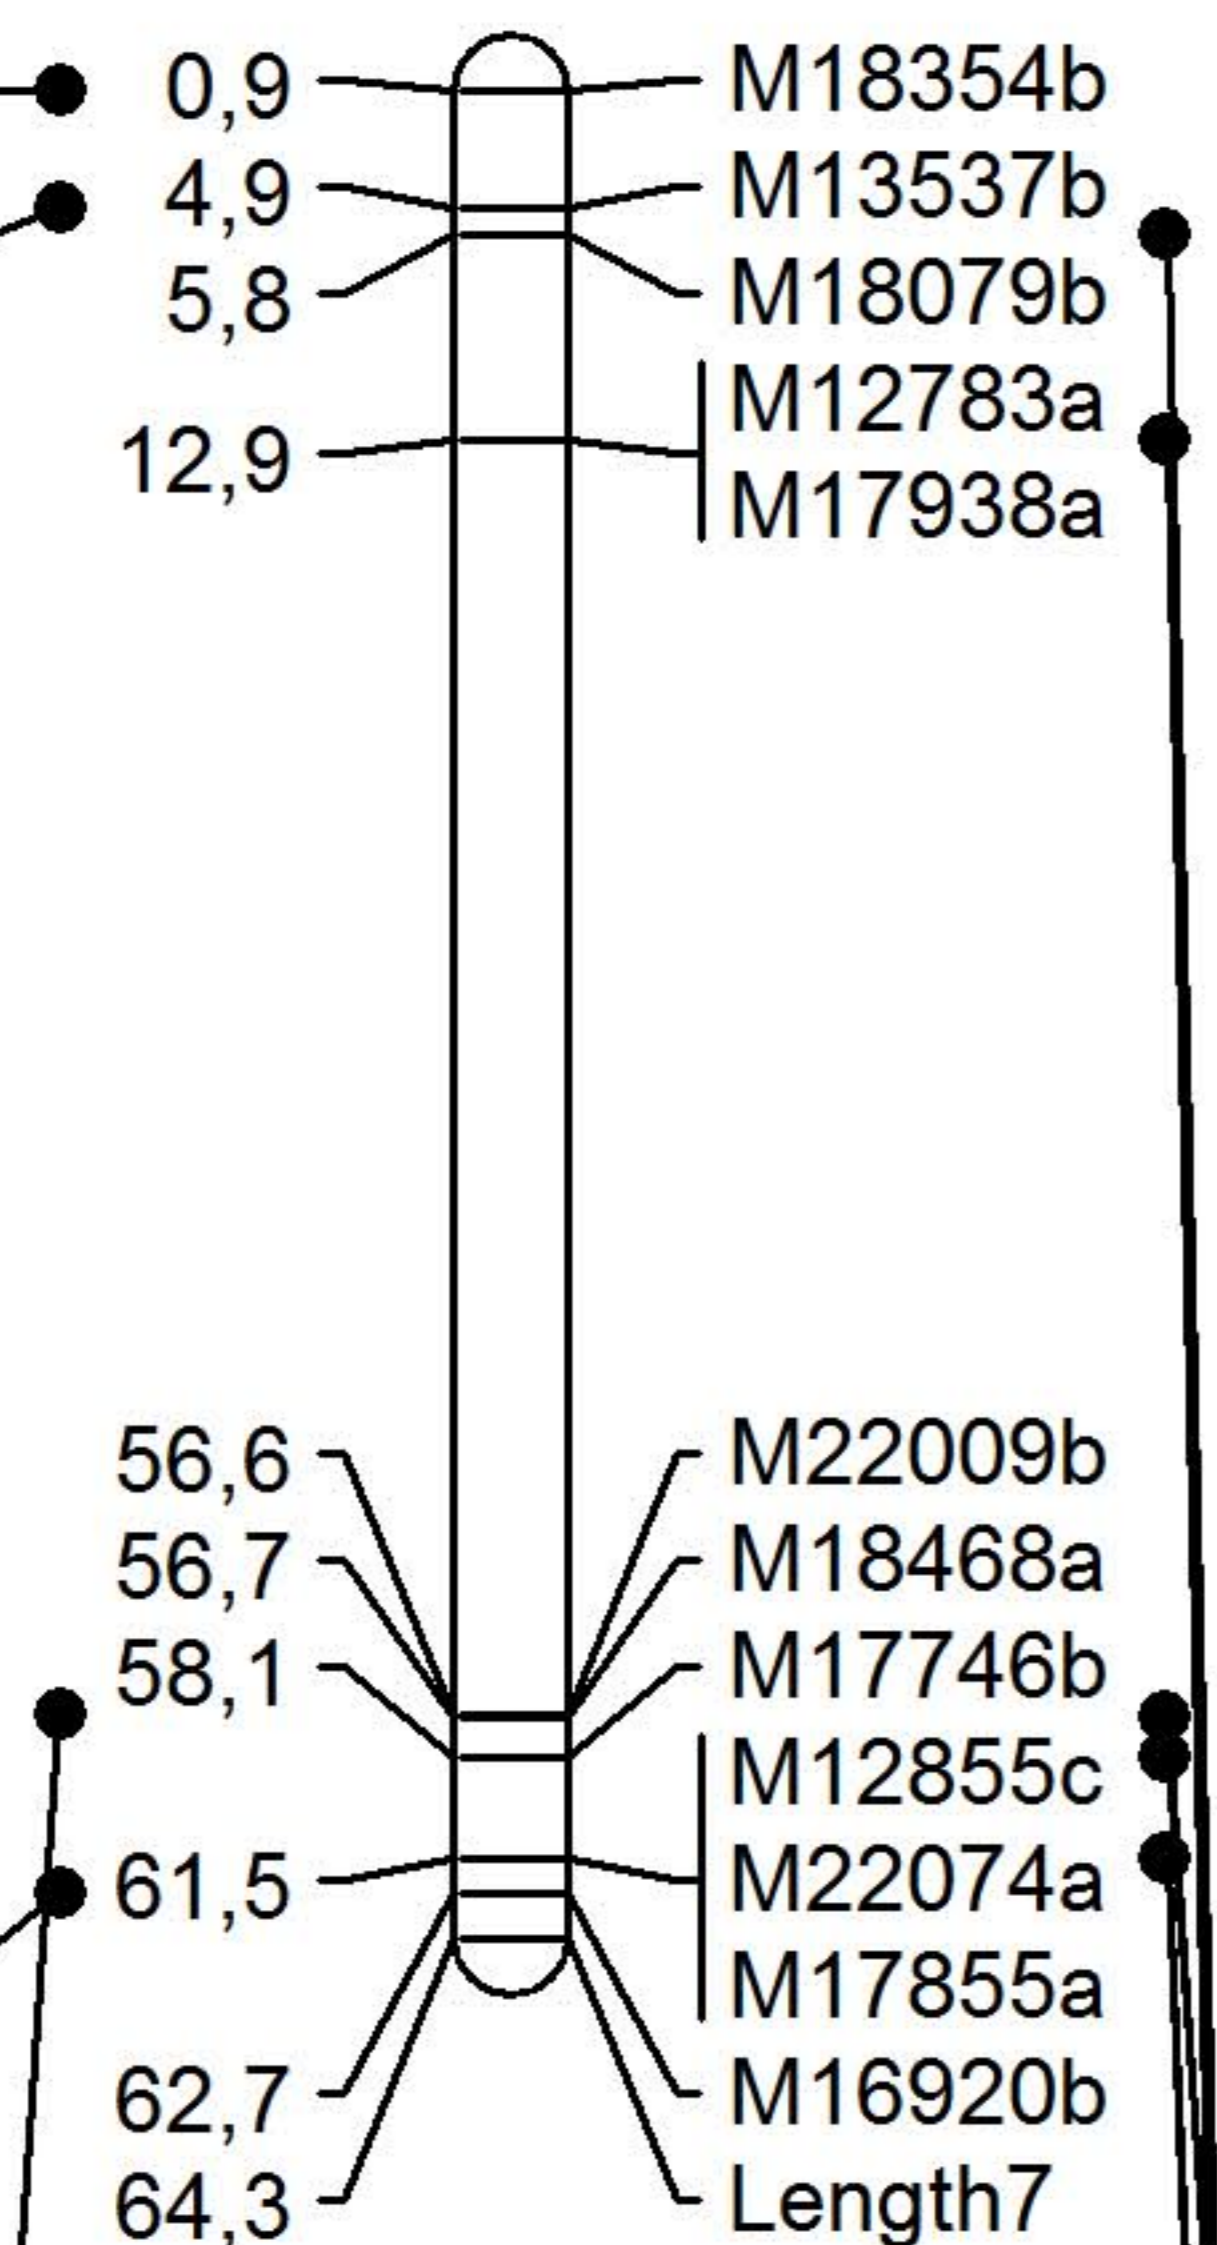**4d7d**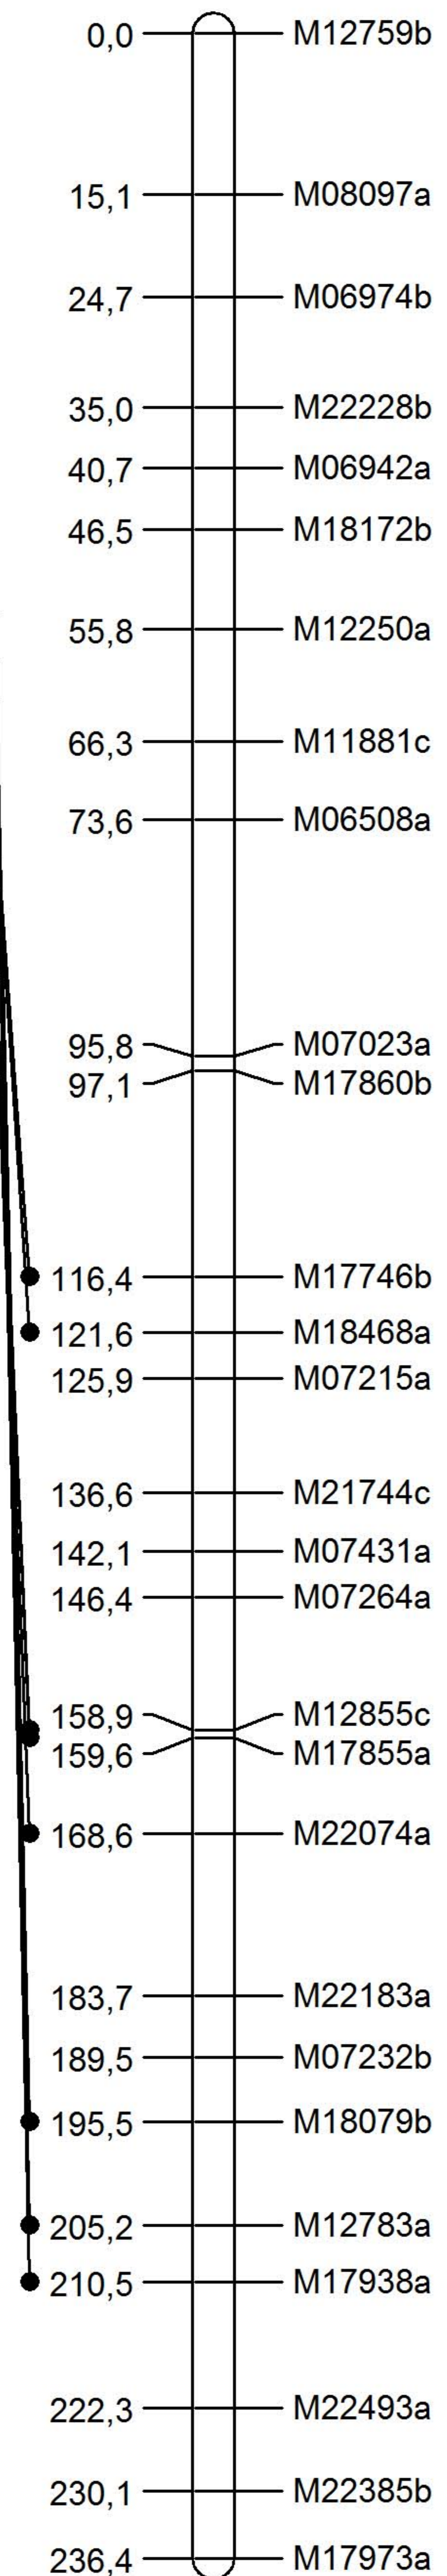**8a**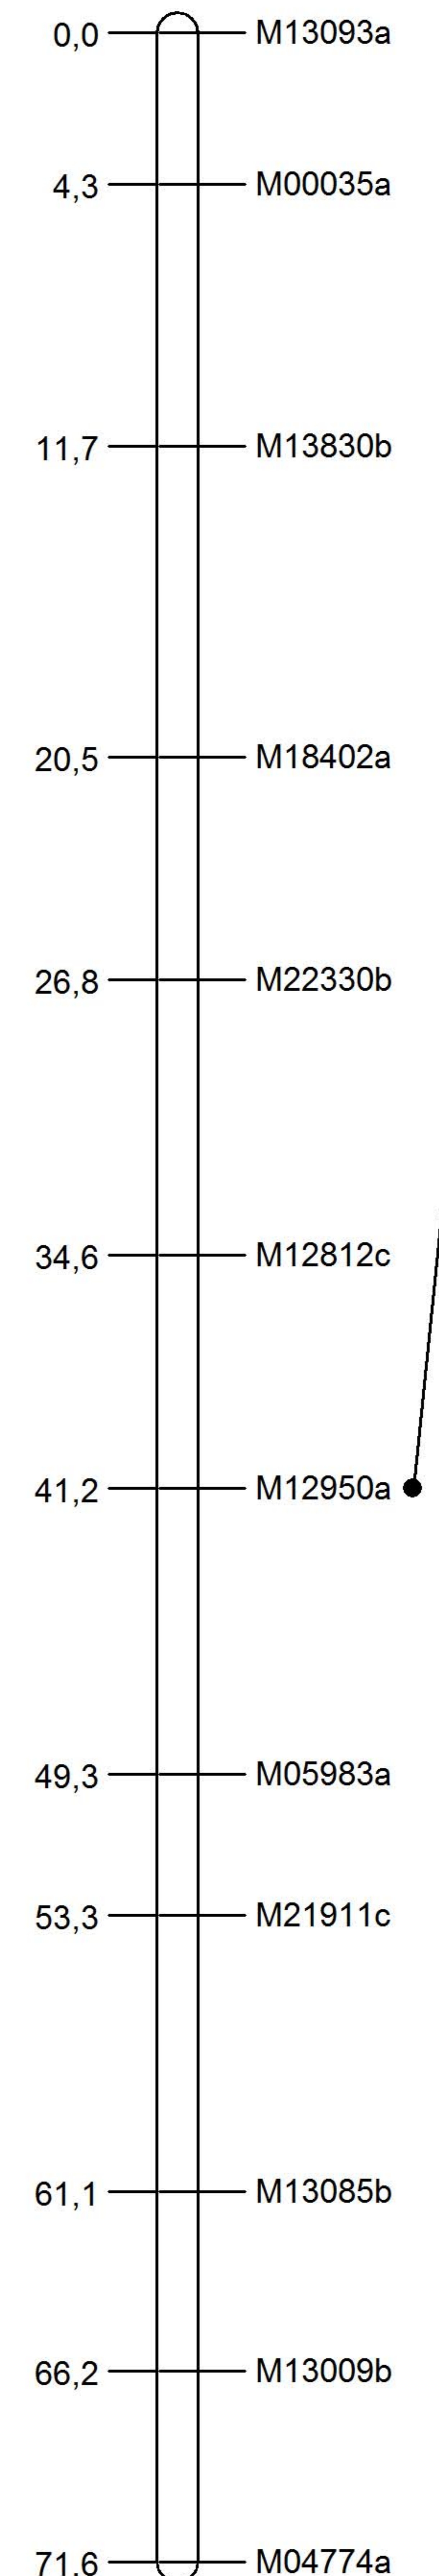**SB08**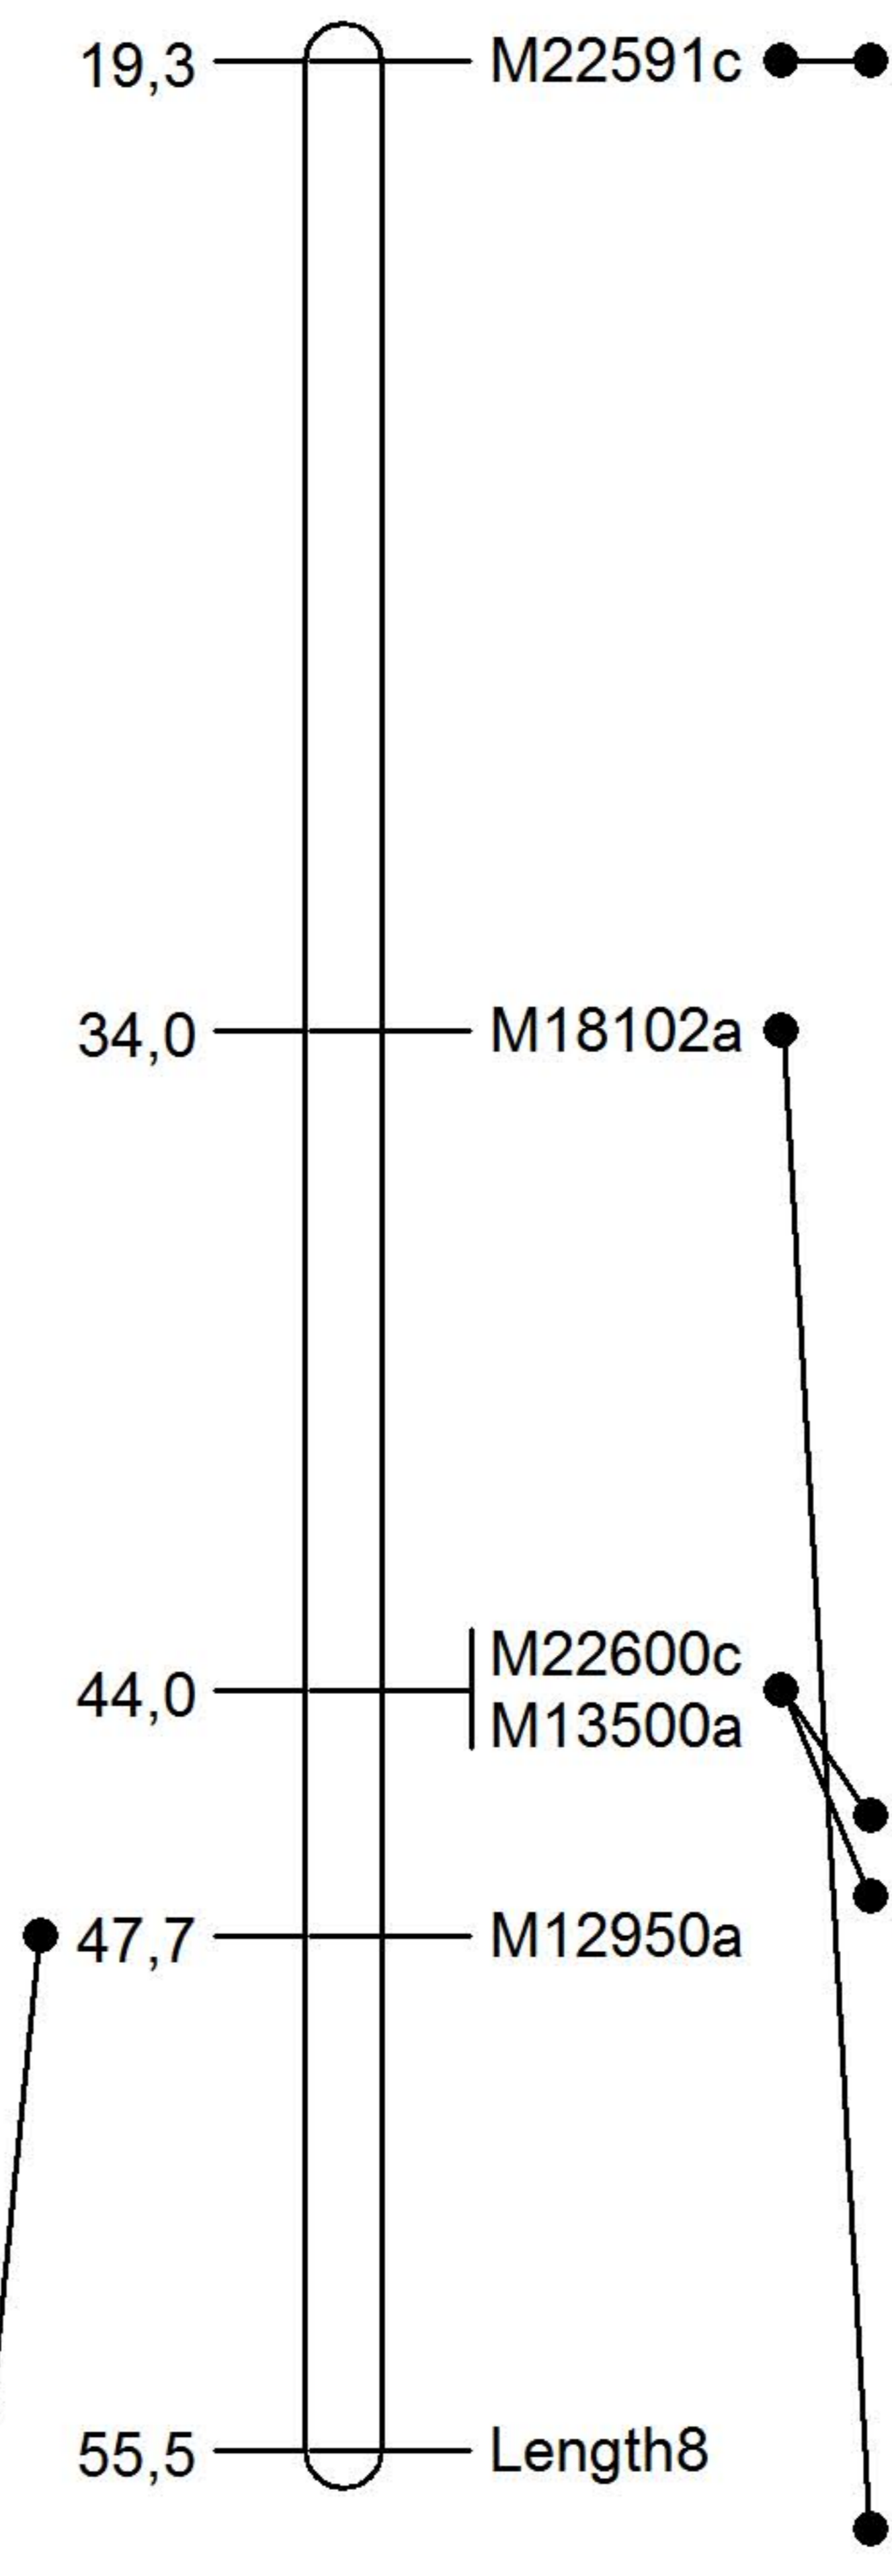**8c**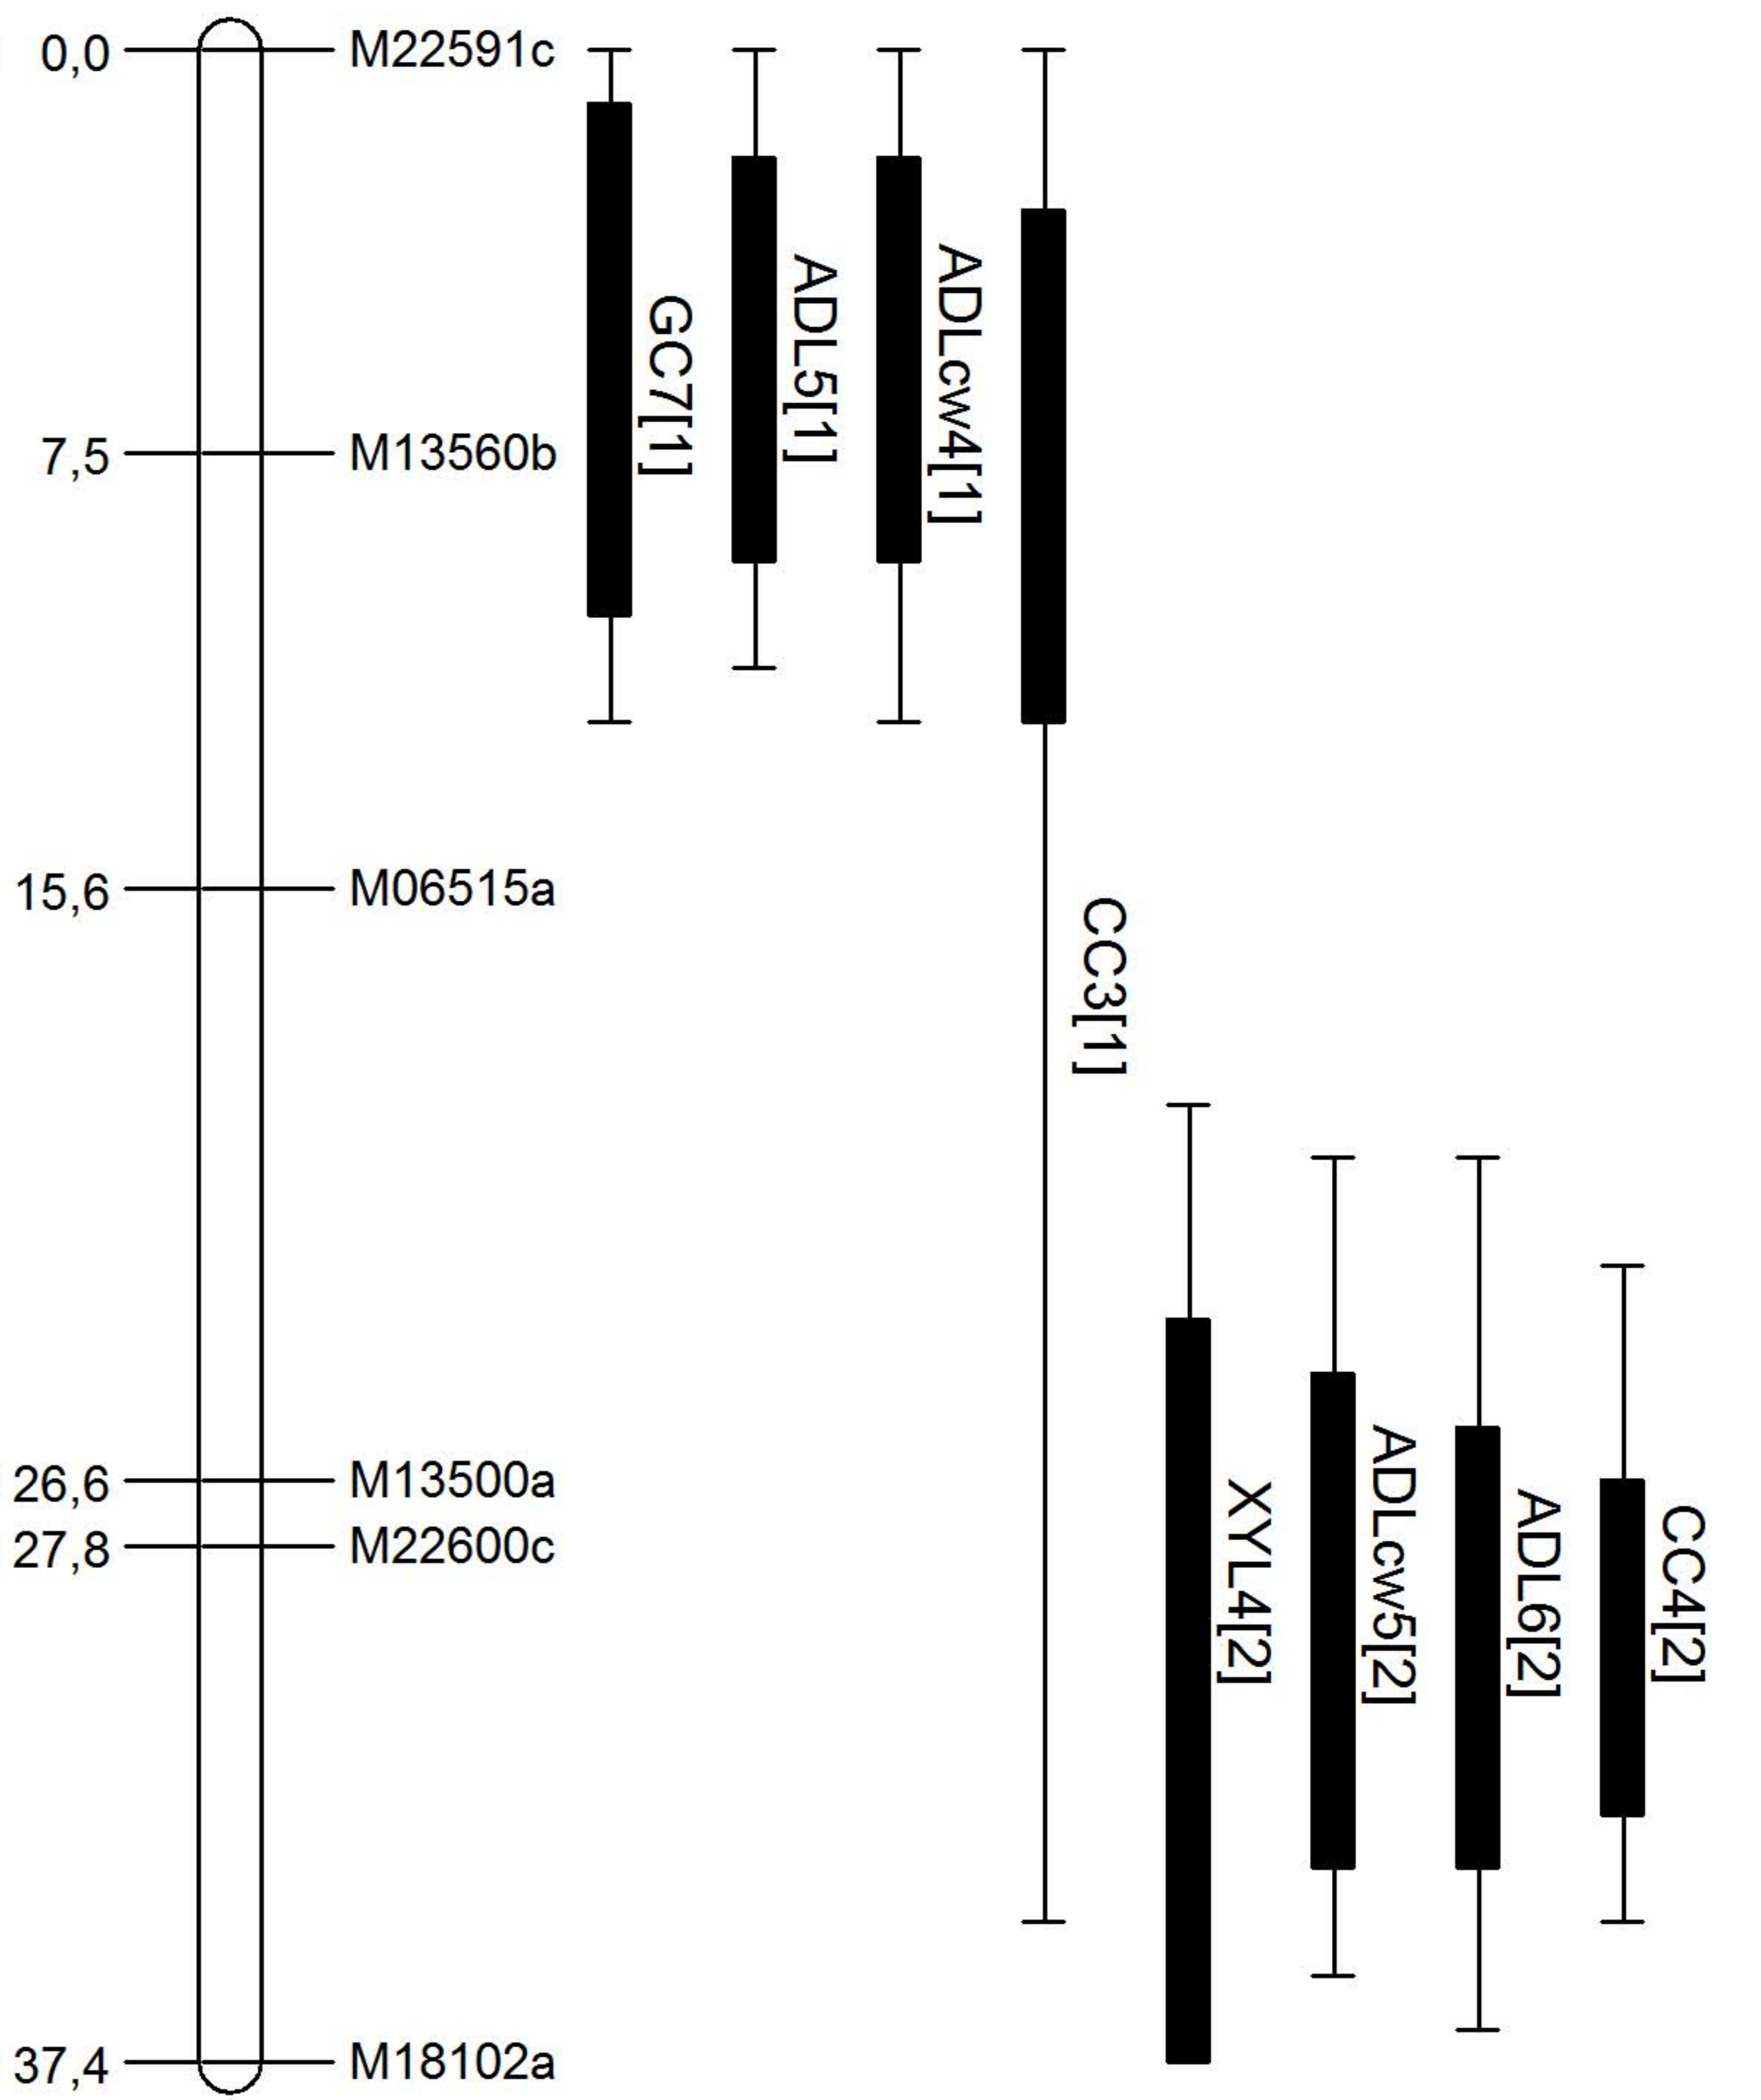

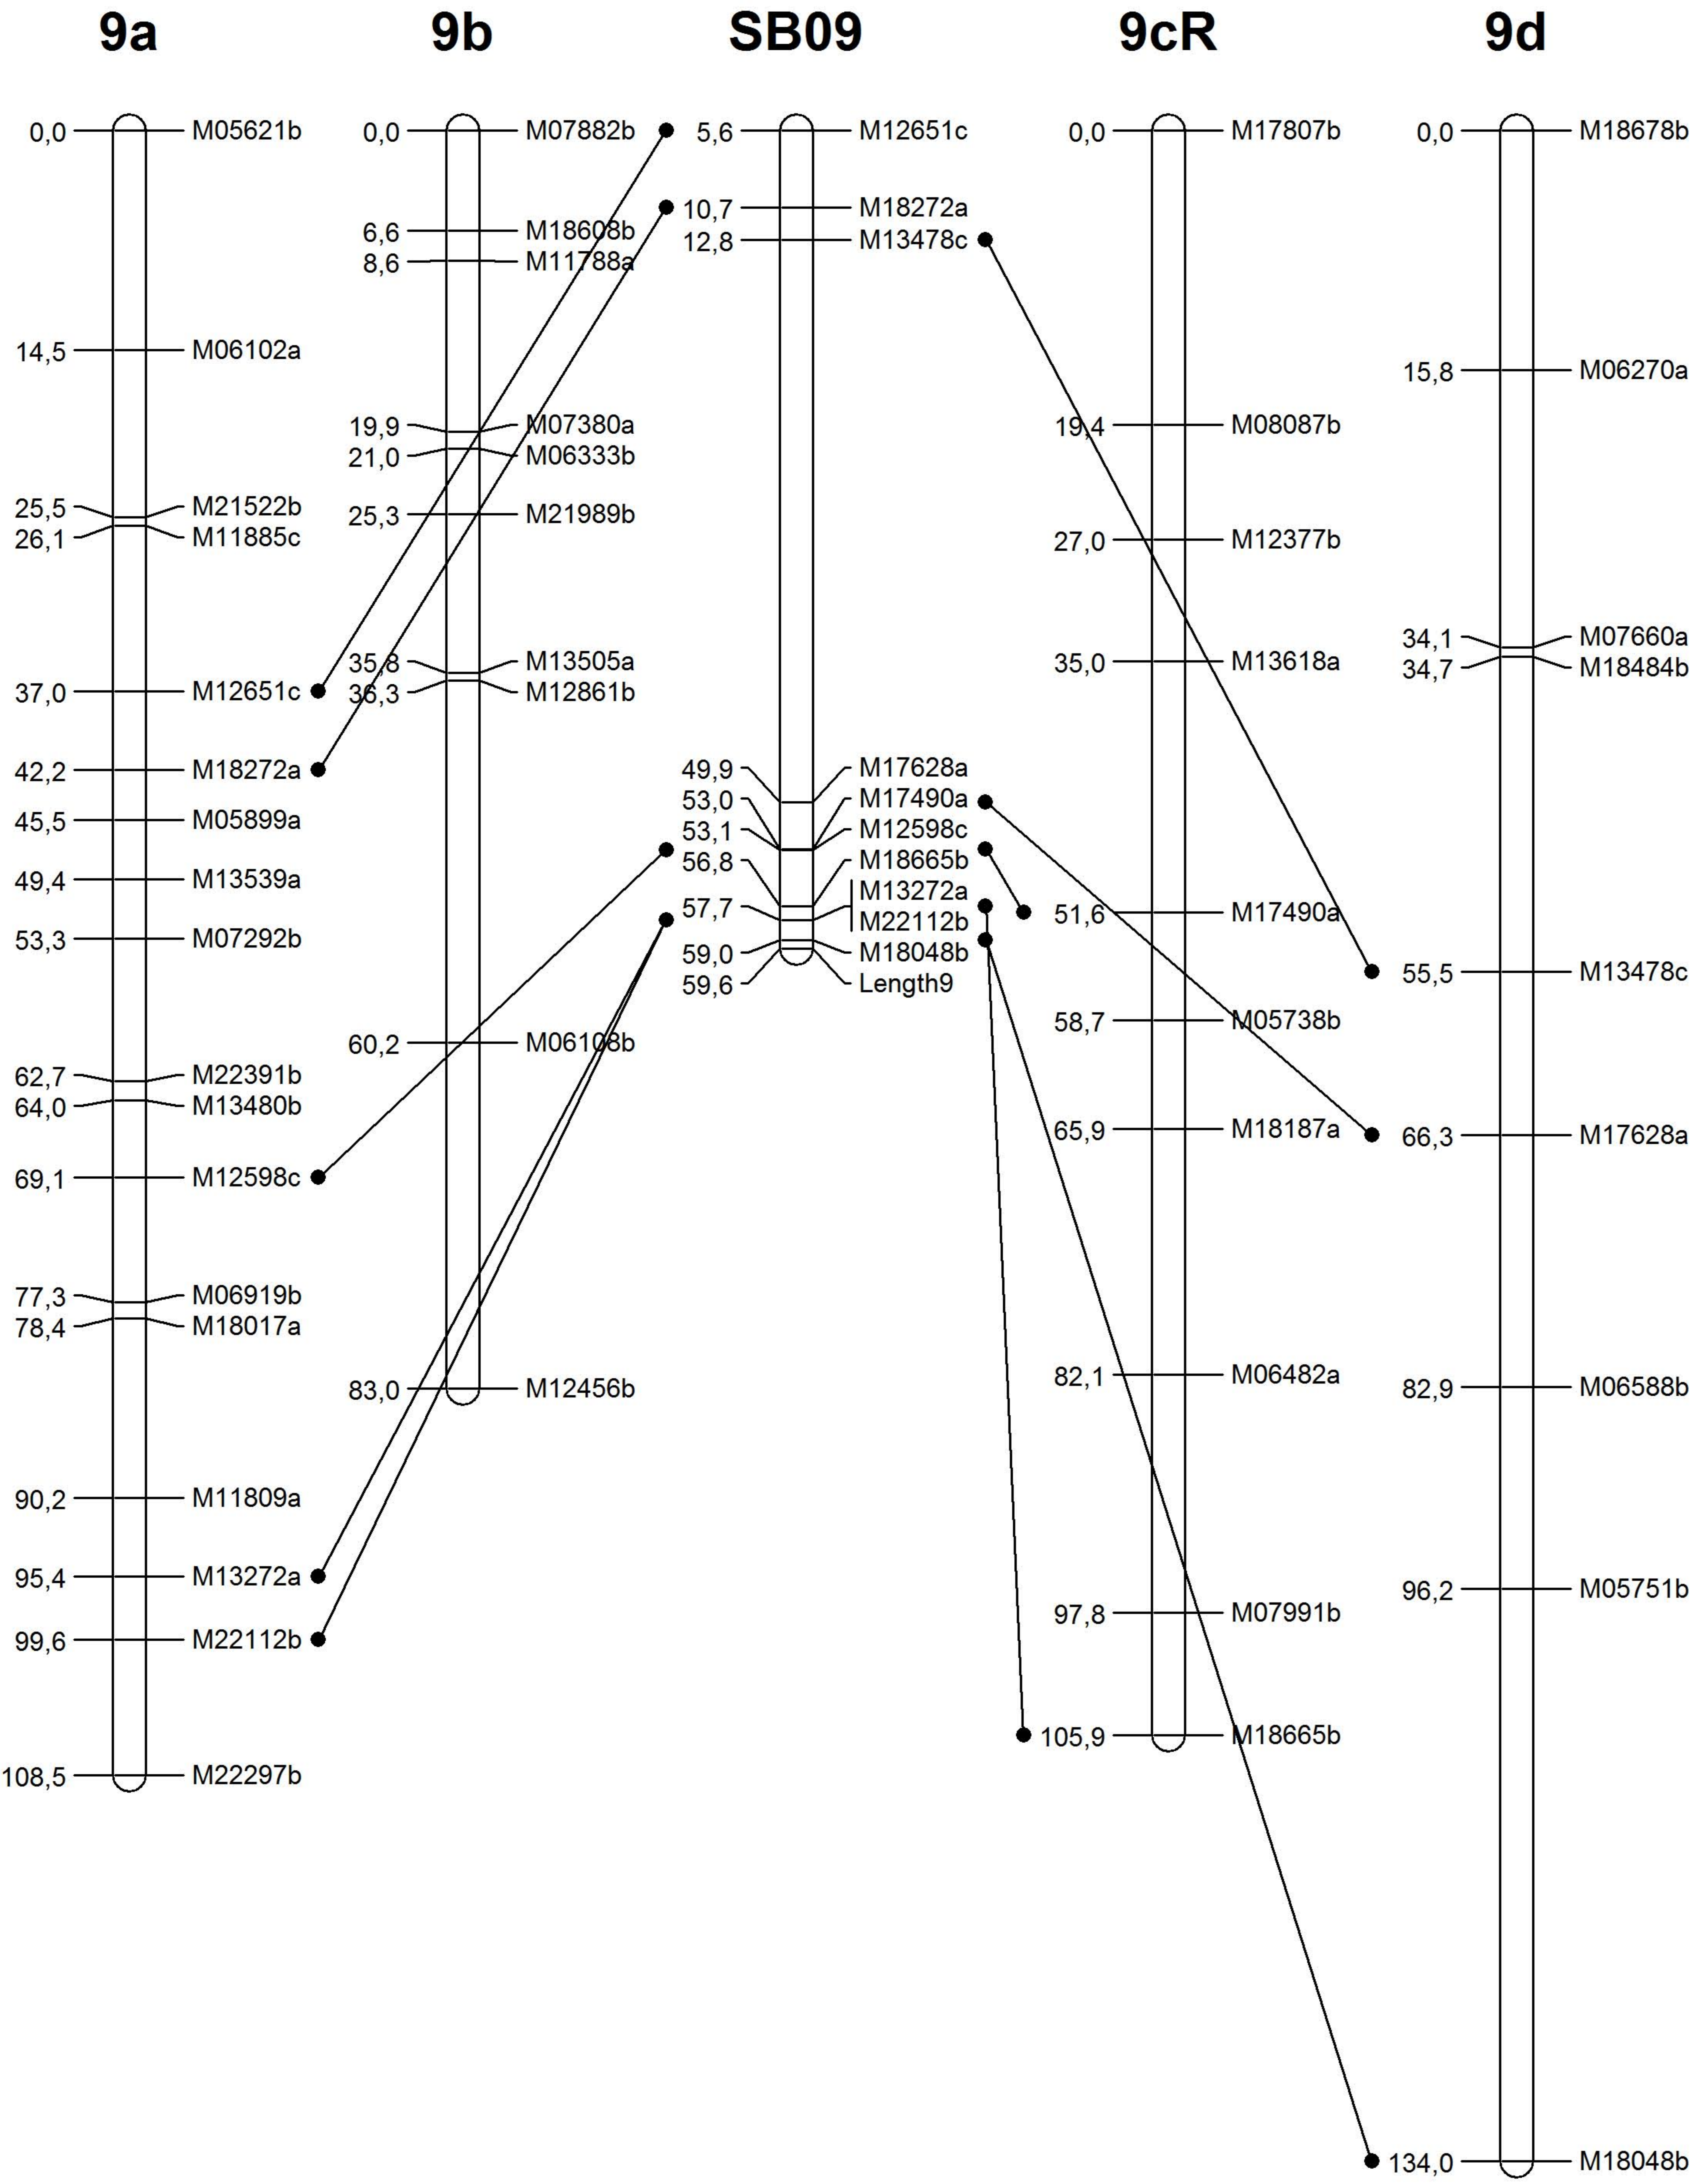



# 10aR

# 10bR

# SB10

# 10cR

# 10d

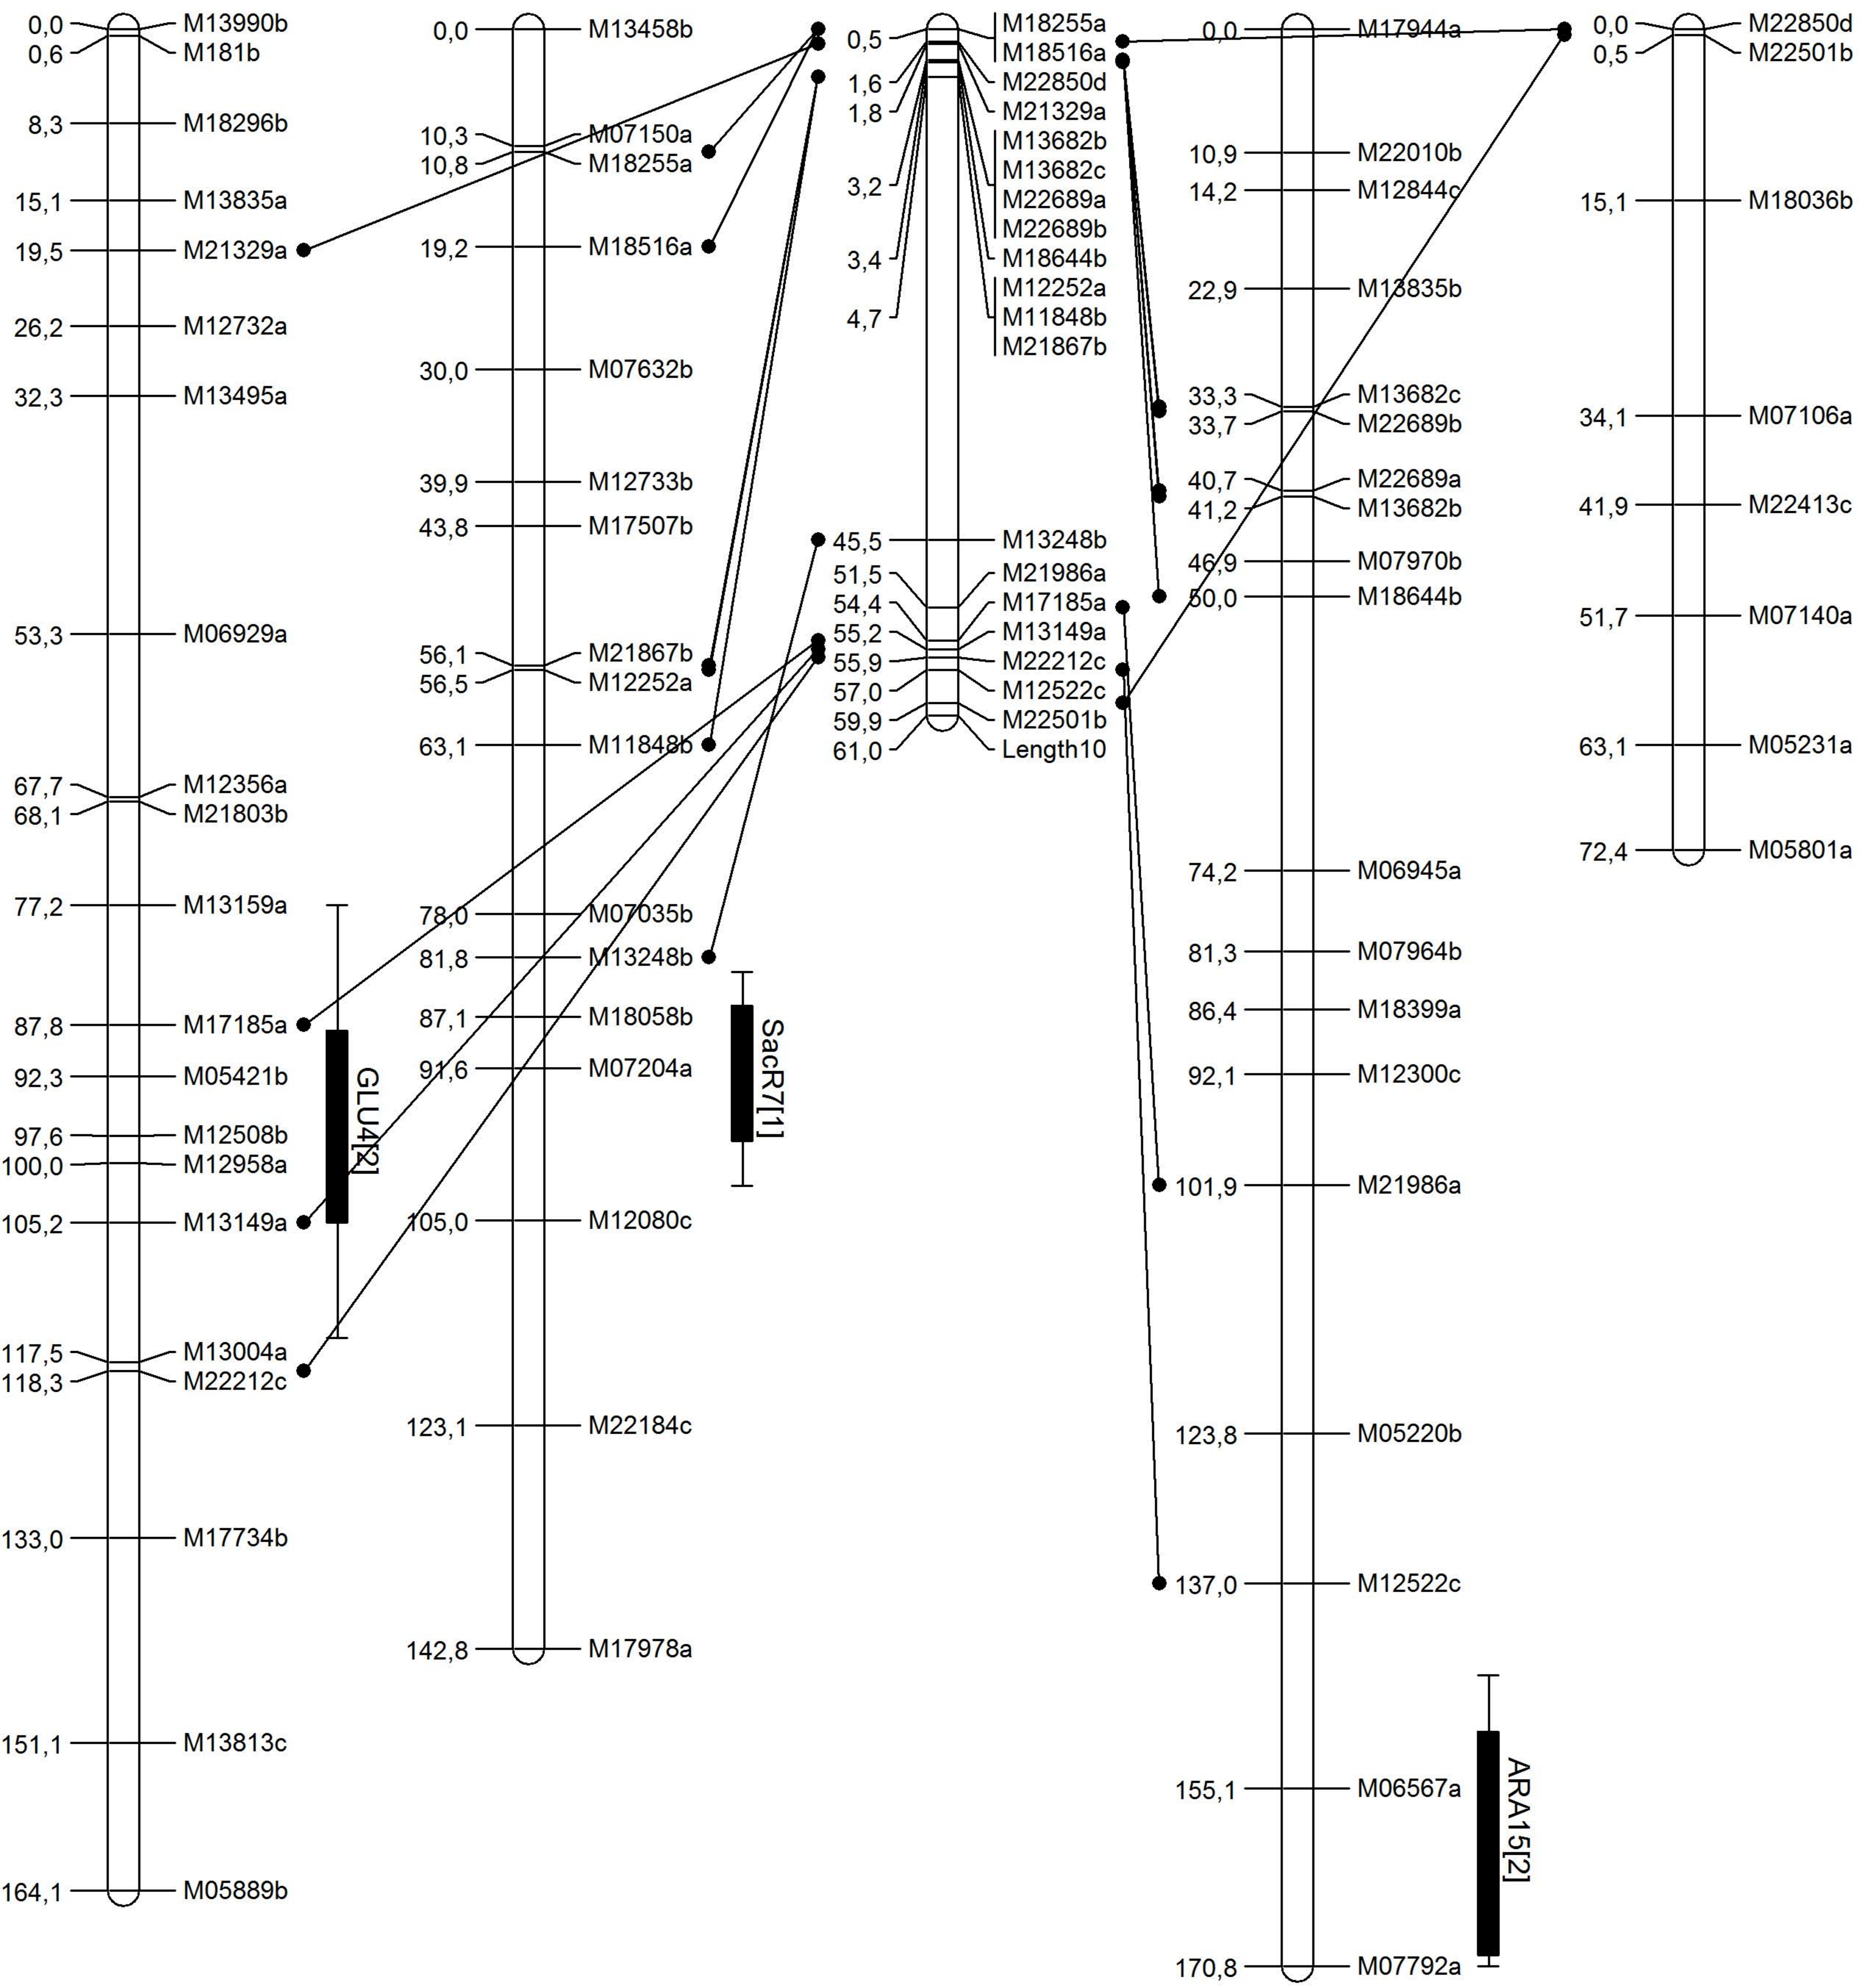

Supplement: MOESM1 [file 12864_2017_3802_MOESM1_ESM.pdf]
